# Supplementary material for: Metal-free oxidative acylation/cyclization of N-methacryloyl-2-phenylbenzoimidazole with aryl aldehydes: an easy access to benzimidazo[2,1-a]isoquinolin-6(5H)-ones
Source: Royal Society of Chemistry journal article supplement (doi:10.1039/c9ob01979k), 2019-01-01

*Supporting information for*

**Metal-free oxidative acylation/cyclization of *N*-methacryloyl-2-phenylbenzimidazole with aryl aldehydes: An easy access to benzimidazo[2,1-*a*]isoquinolin-6(5*H*)-ones**

Boora Ramesh,<sup>[a]</sup> G. Ravi kumar,<sup>[a]</sup> B. V. Subba Reddy,<sup>\*[a]</sup>

<sup>[a]</sup>*Fluoro - Agrochemicals, CSIR-Indian Institute of Chemical Technology, Hyderabad –500 007, India.* E-mail: [basireddy@iiict.res.in](mailto:basireddy@iiict.res.in);

Fax: 91-40-27160512.

|                                                        |                |
|--------------------------------------------------------|----------------|
| <b>1. General methods.....</b>                         | <b>S2</b>      |
| <b>2. Characterization data of products.....</b>       | <b>S2-S9</b>   |
| <b>3. Copies of NMR spectra of 3a-v and 4a,4b.....</b> | <b>S10-S33</b> |

**1. General methods**

All the chemicals were purchased from commercial sources and used without further purification. Reactions were performed in oven-dried sealed tubes and the reactions were conducted under a nitrogen atmosphere. Glass syringes were used to transfer solvents. Crude products were purified by column chromatography on silica gel of 60–120 or 100-200 mesh. Melting points (MP) were obtained on Buchi B-540. <sup>1</sup>H and <sup>13</sup>C NMR (proton-decoupled) spectra were recorded in CDCl<sub>3</sub> solvent on 300, 400 or 500 MHz NMR spectrometer. Chemical shifts (δ) were reported in parts per million (ppm) with respect to TMS as an internal standard. Coupling constants (*J*) are quoted in hertz (Hz). Mass spectra and HRMS were recorded on mass

spectrometry by Electrospray ionization (ESI) or Atmospheric pressure chemical ionization (APCI) technique.

## 2. Characterization data of products

### 3a. 5-Methyl-5-(2-oxo-2-phenylethyl)benzo[4,5]imidazo[2,1-a]isoquinolin-6(5H)-one

White solid, Yield 80%, mp 189-191 °C <sup>1</sup>H NMR (400 MHz, CDCl<sub>3</sub>) δ 8.65 – 8.45 (m, 1H), 8.34 (d, *J* = 7.4 Hz, 1H), 7.86 (d, *J* = 6.9 Hz, 3H), 7.58 – 7.52 (m, 1H), 7.49 – 7.39 (m, 6H), 7.37 – 7.30 (m, 1H), 4.31 (d, *J* = 18.2 Hz, 1H), 4.15 (d, *J* = 18.2 Hz, 1H), 1.73 (s, 3H). <sup>13</sup>C NMR (100 MHz, CDCl<sub>3</sub>) δ 196.1, 173.3, 150.1, 144.1, 141.9, 135.7, 133.6, 131.6, 128.6, 128.1, 127.6, 126.4, 125.6, 125.3, 124.4, 119.8, 115.6, 49.3, 46.2, 30.2. HRMS (*m/z*) calcd for C<sub>24</sub>H<sub>19</sub>O<sub>2</sub>N<sub>2</sub> [M+H]<sup>+</sup> 367.1441, found 367.1457.

### 3b. 5-(2-(3-Chlorophenyl)-2-oxoethyl)-5-methylbenzo[4,5]imidazo[2,1-a]isoquinolin-6(5H)-one

White solid, Yield 75%, mp 209-211 °C <sup>1</sup>H NMR (500 MHz, CDCl<sub>3</sub>) δ 8.60 – 8.53 (m, 1H), 8.33 (d, *J* = 7.6 Hz, 1H), 7.88 (d, *J* = 7.7 Hz, 1H), 7.82 (s, 1H), 7.73 (d, *J* = 7.7 Hz, 1H), 7.52 (d, *J* = 8.0 Hz, 1H), 7.49 – 7.39 (m, 4H), 7.4 (t, *J* = 7.3 Hz, 1H), 7.34 – 7.30 (m, 1H), 4.28 (d, *J* = 18.3 Hz, 1H), 4.09 (d, *J* = 18.3 Hz, 1H), 1.73 (s, 1H). <sup>13</sup>C NMR (100 MHz, CDCl<sub>3</sub>) δ 194.9, 173.1, 150.0, 144.0, 141.7, 137.1, 135.0, 133.6, 131.7, 130.0, 128.2, 127.7, 126.5, 126.1, 125.7, 125.4, 124.3, 123.0, 119.8, 115.6, 49.3, 46.1, 30.2. HRMS (*m/z*) calcd for C<sub>25</sub>H<sub>22</sub>ON<sub>2</sub>Cl [M+H]<sup>+</sup> 401.1415, found 401.1355.

### 3c. 5-(2-(Furan-2-yl)-2-oxoethyl)-5-methylbenzo[4,5]imidazo[2,1-a]isoquinolin-6(5H)-one

White solid, Yield 77%, mp 166-168 °C <sup>1</sup>H NMR (400 MHz, CDCl<sub>3</sub>) δ 8.52 (d, *J* = 7.3 Hz, 1H), 8.34 (d, *J* = 7.1 Hz, 1H), 7.85 (d, *J* = 7.1 Hz, 1H), 7.55 (s, 1H), 7.49 – 7.39 (m, 4H), 7.37 (d, *J* = 7.8 Hz, 1H), 7.07 (d, *J* = 3.4 Hz, 1H), 6.52–6.43 (m, 1H), 4.15 (d, *J* = 18.3 Hz, 1H), 4.03 (d, *J* = 18.3 Hz, 1H), 1.72 (s, 3H). <sup>13</sup>C NMR (126 MHz, CDCl<sub>3</sub>) δ 185.4, 173.1, 152.0, 150.0, 146.4, 144.1, 141.6, 131.6, 129.1, 127.6, 126.4, 125.6, 125.3, 124.6, 123.1, 119.7, 117.2, 115.6, 112.5, 48.9, 45.8, 30.1. HRMS (*m/z*) calcd for C<sub>22</sub>H<sub>17</sub>O<sub>3</sub>N<sub>2</sub> [M+H]<sup>+</sup> 357.1233, found 357.1248.

**3d. 5-Methyl-5-(2-(naphthalen-1-yl)-2-oxoethyl)benzo[4,5]imidazo[2,1-a]isoquinolin-6(5H)-one**

White solid, Yield 69%, mp 186-188 °C <sup>1</sup>H NMR (400 MHz, CDCl<sub>3</sub>) δ 8.60 – 8.55 (m, 1H), 8.43 – 8.34 (m, 1H), 8.12 (d, *J* = 8.6 Hz, 1H), 7.97 (d, *J* = 7.7 Hz, 2H), 7.91 – 7.87 (m, 1H), 7.80 (d, *J* = 7.9 Hz, 1H), 7.55 – 7.42 (m, 6H), 7.41 – 7.34 (m, 2H), 4.47 (d, *J* = 18.0 Hz, 1H), 4.18 (d, *J* = 18.0 Hz, 1H), 1.74 (s, 3H). <sup>13</sup>C NMR (126 MHz, CDCl<sub>3</sub>) δ 200.0, 173.3, 150.1, 144.1, 141.9, 134.2, 133.8, 133.3, 131.7, 131.6, 129.9, 128.2, 128.1, 127.9, 127.6, 126.5, 126.4, 125.6, 125.5, 125.4, 124.4, 124.1, 123.2, 119.8, 115.7, 52.3, 46.7, 30.1. HRMS (*m/z*) calcd for C<sub>28</sub>H<sub>21</sub>O<sub>2</sub>N [M+H]<sup>+</sup> 417.1597, found 417.1607.

**3e. 5-(2-(2-Fluorophenyl)-2-oxoethyl)-5-methylbenzo[4,5]imidazo[2,1-a]isoquinolin-6(5H)-one**

White solid, Yield 68%, mp 159-160 °C <sup>1</sup>H NMR (500 MHz, CDCl<sub>3</sub>) δ 8.58 – 8.52 (m, 1H), 8.37 – 8.30 (m, 1H), 7.91 – 7.83 (m, 1H), 7.62 (td, *J* = 7.7, 1.8 Hz, 1H), 7.54 – 7.39 (m, 5H), 7.39 – 7.35 (m, 1H), 7.19 – 7.09 (m, 2H), 4.31 (dd, *J* = 19.0, 3.3 Hz, 1H), 4.16 (dd, *J* = 19.0, 3.4 Hz, 1H), 1.71 (s, 3H) <sup>13</sup>C NMR (100 MHz, CDCl<sub>3</sub>) δ 194.2, 194.1, 173.3, 163.6, 161.1, 150.1, 144.1, 142.0, 135.4, 135.3, 131.7, 131.6, 130.8, 127.6, 126.3, 125.6, 125.3, 124.5, 124.5, 124.0, 123.9, 123.0, 119.8, 116.8, 116.5, 115.6, 54.1, 54.0, 46.3, 30.2. HRMS (*m/z*) calcd for C<sub>24</sub>H<sub>18</sub>O<sub>2</sub>N<sub>2</sub>F [M+H]<sup>+</sup> 385.1346, found 385.1358.

**3f. 5-Methyl-5-(2-oxo-2-(thiophen-2-yl)ethyl)benzo[4,5]imidazo[2,1-a]isoquinolin-6(5H)-one**

White solid, Yield 79%, mp 192-194 °C <sup>1</sup>H NMR (400 MHz, CDCl<sub>3</sub>) δ 8.57 – 8.50 (m, 1H), 8.38 – 8.30 (m, 1H), 7.90 – 7.81 (m, 1H), 7.76 (d, *J* = 3.1 Hz, 1H), 7.60 (d, *J* = 4.3 Hz, 1H), 7.51 – 7.34 (m, 5H), 7.15 – 7.08 (m, 1H), 4.27 (d, *J* = 17.9 Hz, 1H), 4.05 (d, *J* = 17.9 Hz, 1H), 1.72 (s, 3H). <sup>13</sup>C NMR (100 MHz, CDCl<sub>3</sub>) δ 188.9, 173.0, 149.9, 144.1, 142.6, 141.6, 134.2, 132.2, 131.6, 128.1, 127.6, 126.4, 125.6, 125.4, 124.5, 123.0, 119.8, 115.6, 49.6, 46.2, 30.2. HRMS (*m/z*) calcd for C<sub>24</sub>H<sub>21</sub>N<sub>2</sub>O<sub>2</sub>S [M+H]<sup>+</sup> 401.1323, found 401.1345.

**3g. 5-(2-(4-Bromophenyl)-2-oxoethyl)-5-methylbenzo[4,5]imidazo[2,1-a]isoquinolin-6(5H)-one**

White solid, Yield 67%, mp 230-232 °C <sup>1</sup>H NMR (400 MHz, CDCl<sub>3</sub>) δ 8.58 – 8.51 (m, 1H), 8.36 – 8.30 (m, 1H), 7.75 – 7.69 (m, 1H), 7.75 – 7.69 (m, 2H), 7.59 – 7.55 (m, 2H), 7.49 – 7.39 (m, 4H), 7.34 – 7.30 (m, 1H), 4.27 (d, *J* = 18.2 Hz, 1H), 4.09 (d, *J* = 18.2 Hz, 1H), 1.73 (s, 3H). <sup>13</sup>C NMR (100 MHz, CDCl<sub>3</sub>) δ 195.2, 173.2, 150.0, 144.0, 141.7, 134.4, 132.0, 131.7, 131.6, 129.5, 129.0, 127.7, 126.4, 125.7, 125.4, 124.3, 123.0, 119.8, 115.6, 49.2, 46.1, 30.2. HRMS (*m/z*) calcd for C<sub>24</sub>H<sub>18</sub>O<sub>2</sub>N<sub>2</sub>Br [M+H]<sup>+</sup> 445.0546, found 445.0560.

**3h. 5-(2-([1,1'-Biphenyl]-4-yl)-2-oxoethyl)-5-methylbenzo[4,5]imidazo[2,1-*a*]isoquinolin-6(5*H*)-one**

White solid, Yield 68%, mp 120-122 °C <sup>1</sup>H NMR (500 MHz, CDCl<sub>3</sub>) δ 8.58 – 8.54 (m, 1H), 8.38 – 8.32 (m, 1H), 8.00– 7.99 (m, 2H), 7.89 – 7.85 (m, 1H), 7.67 – 7.61 (m, 2H), 7.61 – 7.57 (m, 2H), 7.49 – 7.34 (m, 8H), 4.34 (d, *J* = 18.2 Hz, 1H), 4.18 (d, *J* = 18.2 Hz, 1H), 1.75 (s, 3H). <sup>13</sup>C NMR (100 MHz, CDCl<sub>3</sub>) δ 195.6, 173.3, 150.1, 146.3, 145.3, 142.0, 139.6, 134.4, 131.6, 128.9, 128.7, 128.4, 127.6, 127.3, 126.4, 125.6, 125.3, 124.4, 123.1, 121.3, 119.8, 118.1, 115.6, 49.3, 46.2, 30.2. HRMS (*m/z*) calcd for C<sub>30</sub>H<sub>23</sub>O<sub>2</sub>N<sub>2</sub> [M+H]<sup>+</sup> 443.1754, found 443.1765.

**3i. 5-(2-(4-Bromothiophen-2-yl)-2-oxoethyl)-5-methylbenzo[4,5]imidazo[2,1-*a*]isoquinolin-6(5*H*)-one**

White solid, Yield 74%, mp 131-133 °C <sup>1</sup>H NMR (300 MHz, CDCl<sub>3</sub>) δ 8.59 – 8.47 (m, 1H), 8.38 – 8.28 (m, 1H), 7.91 – 7.80 (m, 1H), 7.67 (s, 1H), 7.55 – 7.38 (m, 5H), 7.37 – 7.31 (d, 1H), 4.23 (d, *J* = 18.0 Hz, 1H), 3.99 (d, *J* = 18.0 Hz, 1H), 1.72 (s, 3H). <sup>13</sup>C NMR (126 MHz, CDCl<sub>3</sub>) δ 188.0, 172.8, 149.8, 144.1, 143.0, 141.3, 134.3, 131.7, 131.6, 131.5, 127.8, 126.5, 125.7, 125.4, 124.4, 123.0, 119.8, 115.6, 110.9, 49.3, 46.1, 30.2. HRMS (*m/z*) calcd for C<sub>22</sub>H<sub>16</sub>O<sub>2</sub>N<sub>2</sub>BrS[M+H]<sup>+</sup> 451.0110, found 451.0128.

**3j. 5-Methyl-5-(2-oxo-2-(*o*-tolyl)ethyl)benzo[4,5]imidazo[2,1-*a*]isoquinolin-6(5*H*)-one**

White solid, Yield 70%, mp 178-180 °C <sup>1</sup>H NMR (400 MHz, CDCl<sub>3</sub>) δ 8.54 (d, *J* = 5.8 Hz, 1H), 8.36 (d, *J* = 7.1 Hz, 1H), 7.86 (d, *J* = 6.8 Hz, 1H), 7.70 (d, *J* = 7.2 Hz, 1H), 7.53 – 7.30 (m, 7H), 7.14 (d, *J* = 7.0 Hz, 1H), 4.29 (d, *J* = 17.9 Hz, 1H), 4.01 (d, *J* = 18.0 Hz, 1H), 2.10 (s, 3H), 1.69 (s, 3H). <sup>13</sup>C NMR (100 MHz, CDCl<sub>3</sub>) δ 199.8, 173.3, 150.1, 144.0, 142.0, 138.6, 136.4,

132.0, 131.7, 131.5, 131.3, 128.4, 127.5, 126.4, 125.6, 125.3, 124.3, 123.1, 119.7, 115.6, 51.9, 46.5, 30.1, 21.0. HRMS (*m/z*) calcd for C<sub>25</sub>H<sub>21</sub>O<sub>2</sub>N<sub>2</sub> [M+H]<sup>+</sup> 381.1597, found 381.1612.

**3k. 5-(2-(6-Bromobenzo[d][1,3]dioxol-5-yl)-2-oxoethyl)-5-methylbenzo[4,5]imidazo[2,1-a]isoquinolin-6(5H)-one**

White solid, Yield 73%, mp 161-163 °C <sup>1</sup>H NMR (400 MHz, CDCl<sub>3</sub>) δ 8.57 – 8.50 (m, 1H), 8.38 – 8.31 (m, 1H), 7.88 – 7.82 (m, 1H), 7.52 – 7.40 (m, 4H), 7.38 – 7.34 (m, 1H), 6.97 (s, 1H), 6.76 (s, 1H), 5.98 (s, 2H), 4.31 (d, *J* = 18.1 Hz, 1H), 4.09 (d, *J* = 18.1 Hz, 1H), 1.69 (s, 3H). <sup>13</sup>C NMR (100 MHz, CDCl<sub>3</sub>) δ 198.0, 172.9, 150.7, 149.9, 147.4, 144.1, 141.4, 132.9, 131.7, 131.5, 127.7, 126.4, 125.6, 125.4, 124.8, 123.1, 119.8, 115.6, 113.8, 111.9, 109.2, 102.5, 52.9, 46.8, 30.1. HRMS (*m/z*) calcd for C<sub>25</sub>H<sub>18</sub>BrN<sub>2</sub>O<sub>4</sub> [M+H]<sup>+</sup> 489.0449, found 489.0461.

**3l. 5-(2-(3-Methoxyphenyl)-2-oxoethyl)-5-methylbenzo[4,5]imidazo[2,1-a]isoquinolin-6(5H)-one**

White solid, Yield 77%, mp 119-121 °C <sup>1</sup>H NMR (400 MHz, CDCl<sub>3</sub>) δ 8.60 – 8.50 (m, 1H), 8.34 (d, *J* = 7.3 Hz, 1H), 7.86 (d, *J* = 7.2 Hz, 1H), 7.51 (d, *J* = 7.6 Hz, 1H), 7.48 – 7.38 (m, 4H), 7.37 – 7.31 (m, 2H), 7.30 (s, 1H), 7.12 – 7.04 (m, 1H), 4.29 (d, *J* = 18.2 Hz, 1H), 4.13 (d, *J* = 18.2 Hz, 1H), 3.75 (s, 3H), 1.72 (s, 3H). <sup>13</sup>C NMR (126 MHz, CDCl<sub>3</sub>) δ 196.0, 173.3, 159.8, 150.1, 144.1, 141.9, 137.0, 131.7, 131.6, 129.6, 127.6, 126.4, 125.6, 125.3, 124.4, 123.0, 120.7, 120.5, 119.8, 115.6, 111.9, 55.4, 49.4, 46.2, 30.2. HRMS (*m/z*) calcd for C<sub>25</sub>H<sub>21</sub>O<sub>3</sub>N<sub>2</sub> [M+H]<sup>+</sup> 397.1546, found 397.1554.

**3m. 3-Ethyl-5-methyl-5-(2-oxo-2-phenylethyl)benzo[4,5]imidazo[2,1-a]isoquinolin-6(5H)-one**

White solid, Yield 79%, mp 135-137 °C <sup>1</sup>H NMR (400 MHz, CDCl<sub>3</sub>) δ 8.45 (d, *J* = 8.1 Hz, 1H), 8.32 (d, *J* = 7.4 Hz, 1H), 7.91 – 7.81 (m, 3H), 7.59 – 7.51 (m, 1H), 7.47 – 7.37 (m, 4H), 7.29 (d, *J* = 8.6 Hz, 1H), 7.12 (s, 1H), δ 4.30 (d, *J* = 18.2 Hz, 1H), 4.14 (d, *J* = 18.2 Hz, 1H). 2.66 (q, *J* = 7.6 Hz, 2H), 1.72 (s, 3H), 1.20 (t, *J* = 7.6 Hz, 3H). <sup>13</sup>C NMR (126 MHz, CDCl<sub>3</sub>) δ 196.2, 173.5, 150.3, 148.3, 144.1, 142.0, 135.8, 133.6, 131.6, 128.6, 128.1, 127.4, 126.5, 125.5, 125.1,

123.7, 120.6, 119.6, 115.6, 49.3, 46.2, 30.3, 29.1, 15.1. HRMS ( $m/z$ ) calcd for  $C_{26}H_{23}O_2N_2$   $[M+H]^+$  395.1754, found 428.395.1765.

**3n. 3-Bromo-5-(2-(4-bromophenyl)-2-oxoethyl)-5-methylbenzo[4,5]imidazo[2,1-a]isoquinolin-6(5H)-one**

White solid, Yield 67%, mp 131-133 °C  $^1H$  NMR (400 MHz,  $CDCl_3$ )  $\delta$  8.38 – 8.30 (m, 1H), 8.00 – 7.92 (m, 1H), 7.81 – 7.69 (m, 3H), 7.64 – 7.53 (m, 2H), 7.50 – 7.42 (m, 2H), 7.30 – 7.27 (m, 1H), 7.24 – 7.19 (m, 1H), 4.31 (d,  $J = 18.3$  Hz, 1H), 4.07 (d,  $J = 18.3$  Hz, 1H), 1.70 (s, 3H).  $^{13}C$  NMR (100 MHz,  $CDCl_3$ )  $\delta$  194.9, 172.2, 144.8, 143.6, 135.1, 134.3, 132.0, 131.9, 131.6, 131.0, 129.5, 129.1, 126.1, 125.7, 123.6, 122.5, 122.0, 120.8, 115.6, 49.2, 46.6, 30.6. HRMS ( $m/z$ ) calcd for  $C_{24}H_{17}O_2N_2Br_2$   $[M+H]^+$  522.9651, found 522.9692.

**3o. 3-Bromo-5-methyl-5-(2-oxo-2-phenylethyl)benzo[4,5]imidazo[2,1-a]isoquinolin-6(5H)-one**

White solid, Yield 76%, mp 140-142 °C  $^1H$  NMR (500 MHz,  $CDCl_3$ )  $\delta$  8.42 (d,  $J = 8.3$  Hz, 1H), 8.31 (d,  $J = 7.5$  Hz, 1H), 7.92 – 7.81 (m, 3H), 7.61 – 7.53 (m, 2H), 7.50 – 7.37 (m, 5H), 4.34 (d,  $J = 18.4$  Hz, 1H), 4.06 (d,  $J = 18.4$  Hz, 1H), 1.73 (s, 3H).  $^{13}C$  NMR (100 MHz,  $CDCl_3$ )  $\delta$  195.9, 172.5, 149.2, 144.0, 143.8, 135.5, 133.8, 131.6, 131.0, 128.7, 128.1, 127.9, 127.7, 126.1, 125.8, 125.6, 122.2, 119.9, 115.6, 49.4, 46.1, 30.0. HRMS ( $m/z$ ) calcd for  $C_{24}H_{18}O_2N_2Br$   $[M+H]^+$  445.0546, found 445.0558.

**3p. 5-(2-(4-Chlorophenyl)-2-oxoethyl)-5,9,10-trimethylbenzo[4,5]imidazo[2,1-a]isoquinolin-6(5H)-one**

White solid, Yield 71%, mp 119-121 °C  $^1H$  NMR (400 MHz,  $CDCl_3$ )  $\delta$  8.57 – 8.46 (m, 1H), 8.11 (s, 1H), 7.81 – 7.75 (m, 2H), 7.62 (s, 1H), 7.45 – 7.41 (m, 2H), 7.40 – 7.36 (m, 2H), 7.32 – 7.27 (m, 1H), 4.25 (d,  $J = 18.2$  Hz, 1H), 4.06 (d,  $J = 18.2$  Hz, 1H), 2.41 (d,  $J = 4.3$  Hz, 6H), 1.71 (s, 3H).  $^{13}C$  NMR (126 MHz,  $CDCl_3$ )  $\delta$  194.9, 173.1, 149.2, 142.5, 141.5, 140.1, 134.7, 134.6, 134.0, 131.2, 129.9, 129.4, 129.0, 127.6, 126.2, 124.3, 123.3, 120.0, 115.9, 49.1, 46.1, 30.2, 20.5. HRMS ( $m/z$ ) calcd for  $C_{26}H_{22}O_2N_2Cl$   $[M+H]^+$  429.1364, found 429.1371.

**3q. 5,9,10-Trimethyl-5-(2-oxo-2-phenylethyl)benzo[4,5]imidazo[2,1-a]isoquinolin-6(5H)-one**

White solid, Yield 78%, mp 239-241 °C <sup>1</sup>H NMR (500 MHz, CDCl<sub>3</sub>) δ 8.58 – 8.43 (m, 1H), 8.12 (s, 1H), 7.85 (d, *J* = 7.5 Hz, 2H), 7.64 (s, 1H), 7.54 (t, *J* = 7.2 Hz, 1H), 7.46 – 7.35 (m, 4H), 7.34 – 7.28 (m, 1H), 4.29 (d, *J* = 18.2 Hz, 1H), 4.13 (d, *J* = 18.2 Hz, 1H), 2.41 (d, *J* = 5.2 Hz, 6H), 1.71 (s, 3H). <sup>13</sup>C NMR (100 MHz, CDCl<sub>3</sub>) δ 196.0, 173.2, 149.3, 142.5, 141.7, 135.8, 134.6, 134.5, 133.5, 131.2, 130.0, 128.6, 128.0, 127.5, 126.2, 124.3, 123.3, 120.0, 115.9, 49.2, 46.1, 30.2, 20.5. HRMS (*m/z*) calcd for C<sub>26</sub>H<sub>23</sub>O<sub>2</sub>N<sub>2</sub> [M+H]<sup>+</sup> 395.1754, found 395.1762.

**3r. 5,9,10-Trimethyl-5-(2-oxo-2-(thiophen-2-yl)ethyl)benzo[4,5]imidazo[2,1-a]isoquinolin-6(5H)-one**

White solid, Yield 73%, mp 219-221 °C <sup>1</sup>H NMR (400 MHz, CDCl<sub>3</sub>) δ 8.50 (d, *J* = 6.7 Hz, 1H), 8.12 (s, 1H), 7.75 (d, *J* = 3.0 Hz, 1H), 7.64 – 7.54 (m, 2H), 7.48 – 7.38 (m, 2H), 7.37 – 7.31 (d, *J* = 6.9 Hz, 1H), 7.15 – 7.07 (m, 1H), 4.24 (d, *J* = 17.9 Hz, 1H), 4.02 (d, *J* = 17.9 Hz, 1H), 2.41 (s, 6H), 1.70 (s, 1H). <sup>13</sup>C NMR (100 MHz, CDCl<sub>3</sub>) δ 188.8, 182.4, 173.0, 149.2, 142.7, 142.5, 141.3, 134.6, 134.5, 134.1, 132.1, 131.2, 130.0, 128.1, 127.6, 126.2, 124.4, 123.3, 120.0, 115.9, 49.6, 46.1, 30.2, 20.5. HRMS (*m/z*) calcd for C<sub>24</sub>H<sub>21</sub>O<sub>2</sub>N<sub>2</sub>S [M+H]<sup>+</sup> 401.1318, found 401.1312.

**3s. 2-Chloro-5-methyl-5-(2-oxo-2-phenylethyl)benzo[4,5]imidazo[2,1-a]isoquinolin-6(5H)-one**

White solid, Yield 65%, mp 97-99 °C <sup>1</sup>H NMR (400 MHz, CDCl<sub>3</sub>) δ 8.55 (d, *J* = 2.2 Hz, 1H), 8.36 – 8.30 (m, 1H), 8.15 – 8.09 (m, 1H), 7.85 (dd, *J* = 9.3, 2.0 Hz, 1H), 7.57 (dd, *J* = 14.6, 7.2 Hz, 1H), 7.50 – 7.38 (m, 1H), 7.27 (d, *J* = 5.4 Hz, 1H), 4.32 (d, *J* = 18.3 Hz, 1H), 4.09 (d, *J* = 18.3 Hz, 1H), 1.72 (s, 1H). <sup>13</sup>C NMR (126 MHz, CDCl<sub>3</sub>) δ 196.0, 172.7, 148.8, 143.9, 140.2, 135.5, 133.8, 131.6, 130.2, 129.3, 129.2, 128.7, 128.5, 128.1, 126.1, 125.9, 125.9, 125.8, 124.7, 120.0, 115.7, 49.4, 46.0, 30.0. HRMS (*m/z*) calcd for C<sub>25</sub>H<sub>22</sub>ON<sub>2</sub>Cl [M+H]<sup>+</sup> 401.1415, found 401.1070.

**3t. 1-Bromo-5-methyl-5-(2-oxo-2-phenylethyl)benzo[4,5]imidazo[2,1-a]isoquinolin-6(5H)-one**

White solid, Yield 68%, mp 194-196 °C <sup>1</sup>H NMR (400 MHz, CDCl<sub>3</sub>) δ 8.39 – 8.31 (m, 1H), 8.01 – 7.94 (m, 1H), 7.91 – 7.83 (m, 2H), 7.76 (dd, *J* = 7.9, 1.0 Hz, 1H), 7.60 – 7.52 (m, 1H), 7.49 – 7.39 (m, 4H), 7.33 – 7.28 (m, 1H), 7.24 – 7.18 (m, 1H), 4.35 (d, *J* = 18.3 Hz, 1H), 4.14 (d, *J* = 18.3 Hz, 1H), 1.70 (s, 3H). <sup>13</sup>C NMR (100 MHz, CDCl<sub>3</sub>) δ 195.9, 172.3, 147.5, 145.0, 135.6, 135.0, 133.7, 131.0, 130.9, 128.7, 128.1, 126.1, 125.6, 123.6, 122.5, 121.9, 120.7, 115.6, 49.3, 46.7, 30.6. HRMS (*m/z*) calcd for C<sub>24</sub>H<sub>18</sub>O<sub>2</sub>N<sub>2</sub>Br [M+H]<sup>+</sup> 445.0546, found 445.0565.

**3u. 6-methyl-6-(2-oxo-2-phenylethyl)imidazo[2,1-a]isoquinolin-5(6H)-one**

Colourless oil, Yield 22%, <sup>1</sup>H NMR (400 MHz, CDCl<sub>3</sub>) δ 8.34 – 8.29 (m, 1H), 7.88 – 7.85 (m, 1H), 7.68 (d, *J* = 1.6 Hz, 1H), 7.57 – 7.51 (m, 1H), 7.45 – 7.39 (m, 1H), 7.39 – 7.34 (m, 1H), 7.31 (d, *J* = 1.6 Hz, 1H), 4.22 (d, *J* = 18.2 Hz, 1H), 4.15 (d, *J* = 18.2 Hz, 1H), 1.66 (s, 1H). <sup>13</sup>C NMR (126 MHz, CDCl<sub>3</sub>) δ 196.0, 172.7, 135.6, 133.7, 131.9, 130.2, 128.9, 128.7, 128.1, 127.9, 127.5, 124.9, 124.1, 114.0, 49.5, 45.9, 29.9. HRMS (*m/z*) calcd for C<sub>20</sub>H<sub>16</sub>N<sub>2</sub>O<sub>2</sub> [M+H]<sup>+</sup> 317.1290, found 317.1283.

**3v. 5-(2-oxo-2-phenylethyl)-5-phenylbenzo[4,5]imidazo[2,1-a]isoquinolin-6(5H)-one**

Colourless oil, Yield 36%, <sup>1</sup>H NMR (400 MHz, CDCl<sub>3</sub>) δ 8.56 – 8.53 (m, 1H), 8.23 (d, *J* = 7.6 Hz, 1H), 8.10 (d, *J* = 7.7 Hz, 1H), 7.94 – 7.88 (m, 2H), 7.86 (d, *J* = 7.7 Hz, 1H), 7.57 (t, *J* = 7.4 Hz, 2H), 7.50 – 7.36 (m, 9H), 7.25 (s, 2H), 7.19 (d, *J* = 7.9 Hz, 1H), 4.89 (d, *J* = 17.8 Hz, 1H), 4.52 (d, *J* = 17.8 Hz, 1H). <sup>13</sup>C NMR (126 MHz, CDCl<sub>3</sub>) δ 196.0, 171.0, 150.1, 144.1, 140.8, 135.9, 133.7, 133.3, 131.7, 130.1, 129.1, 128.7, 128.5, 128.4, 128.1, 128.0, 127.6, 127.2, 126.4, 126.2, 125.6, 125.4, 124.6, 119.8, 115.6, 54.2, 48.2. HRMS (*m/z*) calcd for C<sub>29</sub>H<sub>20</sub>N<sub>2</sub>O<sub>2</sub> [M+H]<sup>+</sup> found 429.1603, found 429.1609.

**4a. 5-(2-Hydroxyethyl)-5-methylbenzo[4,5]imidazo[2,1-a]isoquinolin-6(5H)-one**

White solid, Yield 55%, mp 159-161 °C <sup>1</sup>H NMR (400 MHz, CDCl<sub>3</sub>) δ 8.42 (dd, *J* = 7.8, 1.0 Hz, 1H), 8.39 – 8.33 (m, 1H), 7.80 – 7.72 (m, 1H), 7.60 – 7.51 (m, 1H), 7.48 – 7.36 (m, 4H), 3.62 – 3.49 (m, 1H), 3.32 – 3.18 (m, 1H), 3.00 – 2.84 (m, 1H), 2.30 – 2.18 (m, 1H), 1.74 (s, 3H). <sup>13</sup>C NMR (100 MHz, CDCl<sub>3</sub>) δ 173.7, 149.7, 143.8, 140.8, 131.7, 131.5, 127.7, 126.1, 125.9, 125.7,



125.4, 123.0, 119.6, 115.7, 59.0, 47.0, 44.0, 29.9. HRMS ( $m/z$ ) calcd for  $C_{18}H_{17}N_2O_2$   $[M+H]^+$  293.1290, found 293.1278.

**4b. 5-(2-Hydroxypropyl)-5-methylbenzo[4,5]imidazo[2,1-a]isoquinolin-6(5H)-one**

White solid, Yield 63%, mp 140-142 °C  $^1H$  NMR (400 MHz,  $CDCl_3$ )  $\delta$  8.47 (d,  $J = 7.7$  Hz, 1H), 8.39 – 8.32 (m, 1H), 7.86 – 7.78 (m, 1H), 7.63 – 7.53 (m, 2H), 7.51 – 7.39 (m, 3H), 3.81 – 3.66 (m, 1H), 2.60 – 2.50 (m, 1H), 2.36 – 2.27 (m, 1H), 1.76 (s, 3H). 1.00 (d,  $J = 6.2$  Hz, 3H).  $^{13}C$  NMR (100 MHz,  $CDCl_3$ )  $\delta$  173.4, 149.8, 144.1, 142.0, 131.7, 131.3, 127.7, 126.5, 126.1, 125.9, 125.6, 122.4, 119.8, 115.7, 65.7, 50.9, 47.8, 29.6, 24.3. HRMS ( $m/z$ ) calcd for  $C_{19}H_{19}N_2O_2$   $[M+H]^+$  307.1446, found 307.1424.

**3. Copies of NMR spectra of products**

<sup>1</sup>H NMR (400 MHz, CDCl<sub>3</sub>) of compound 3a

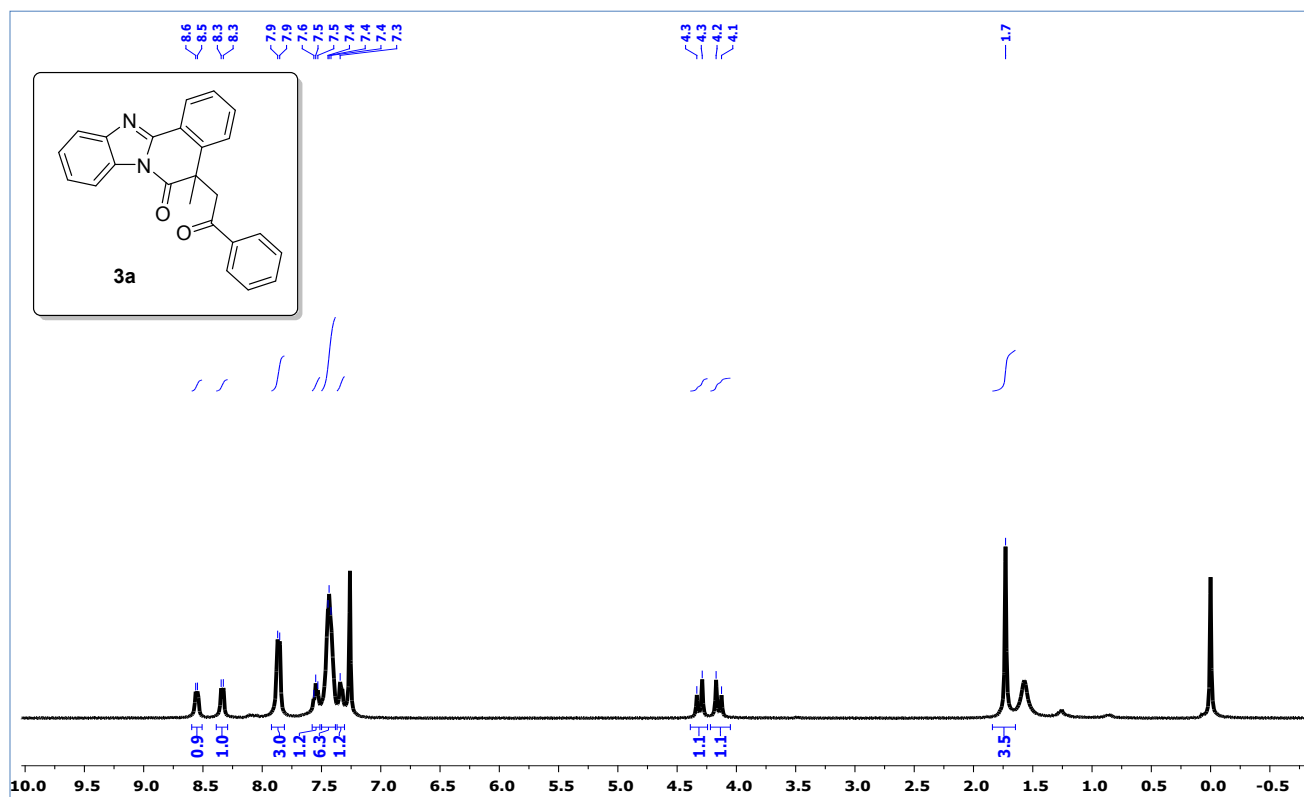

<sup>13</sup>C NMR (100 MHz, CDCl<sub>3</sub>) of compound 3a

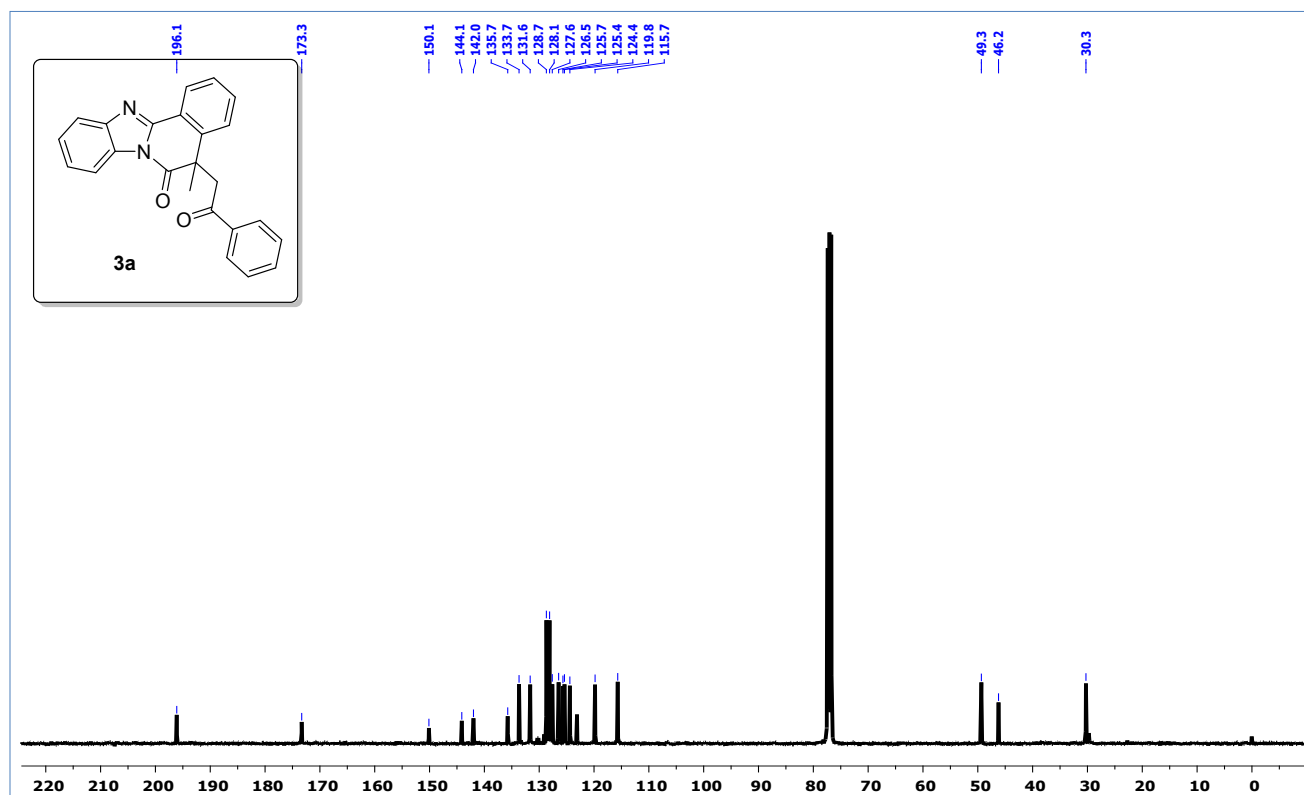

**<sup>1</sup>H NMR (500 MHz, CDCl<sub>3</sub>) of compound 3b**

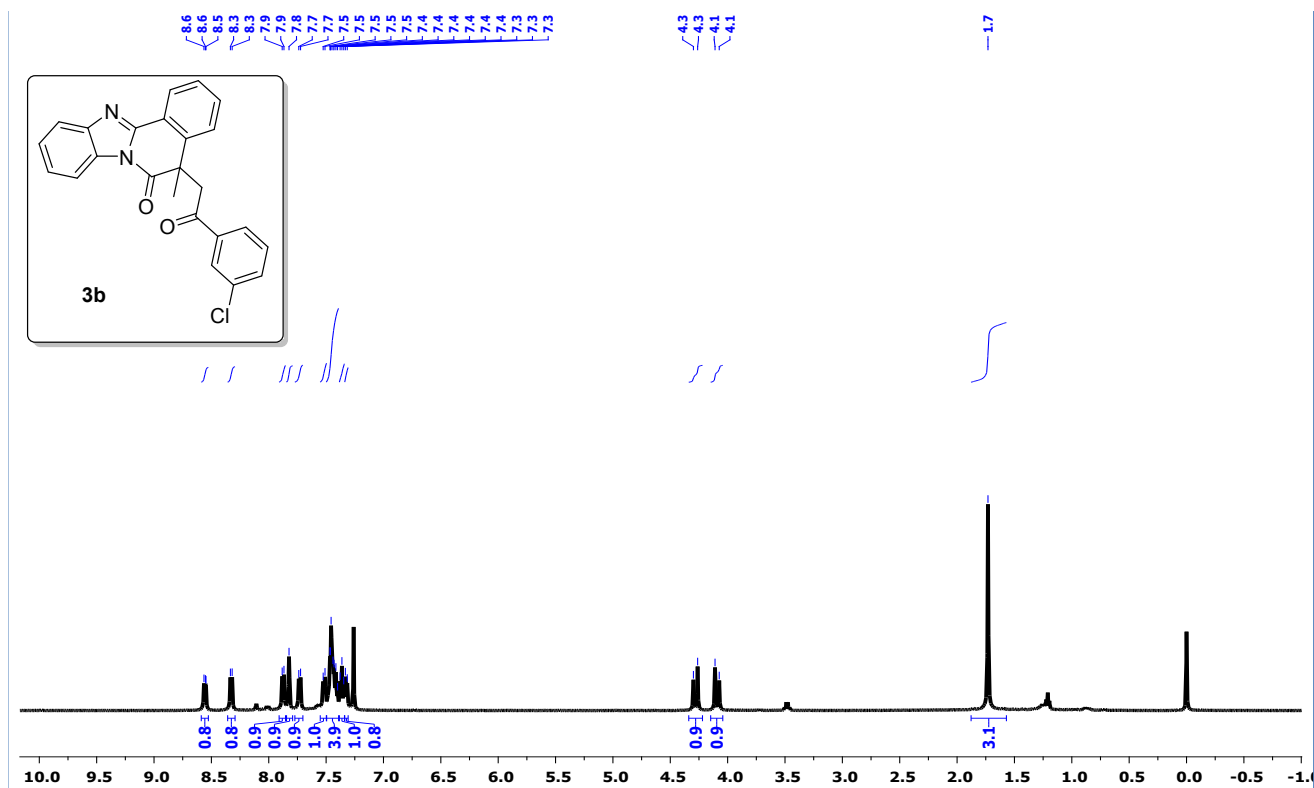

**<sup>13</sup>C NMR (100 MHz, CDCl<sub>3</sub>) of compound 3b**

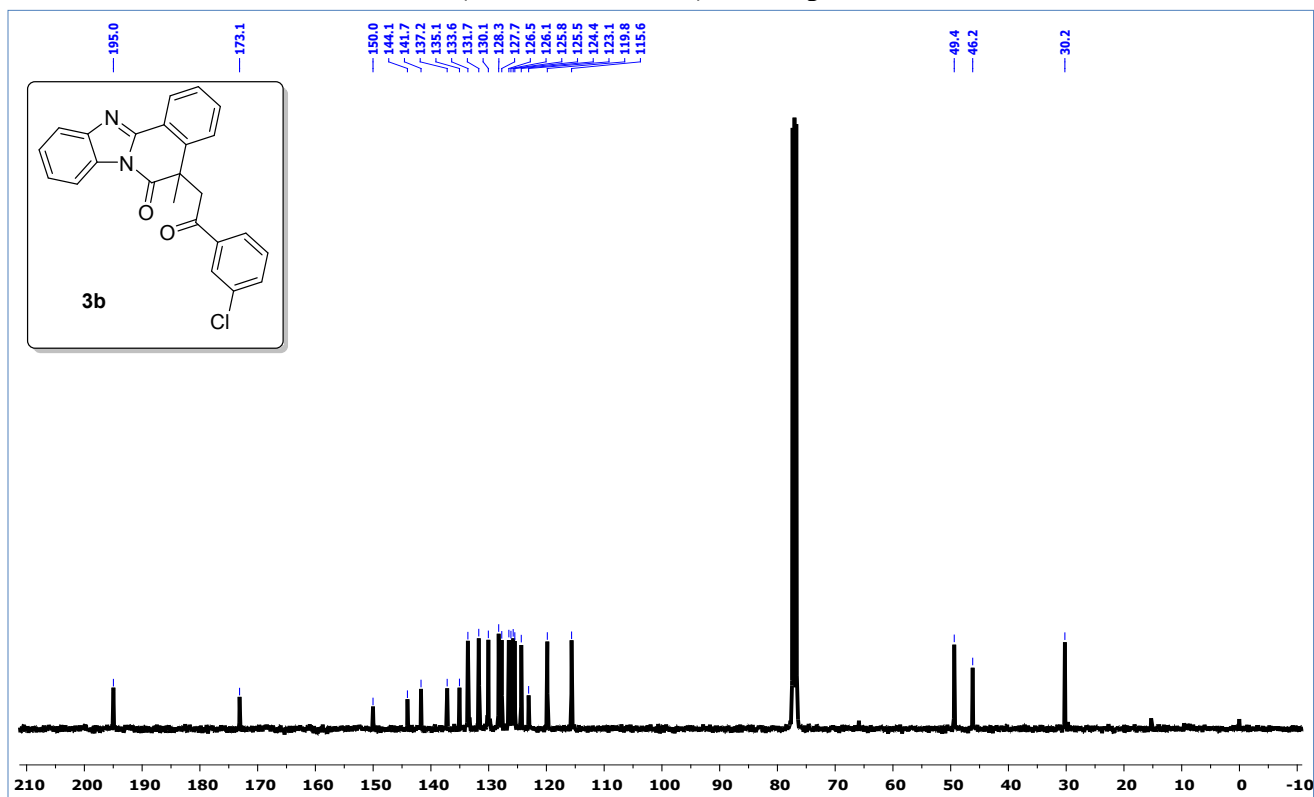

<sup>1</sup>H NMR (400 MHz, CDCl<sub>3</sub>) of compound 3c

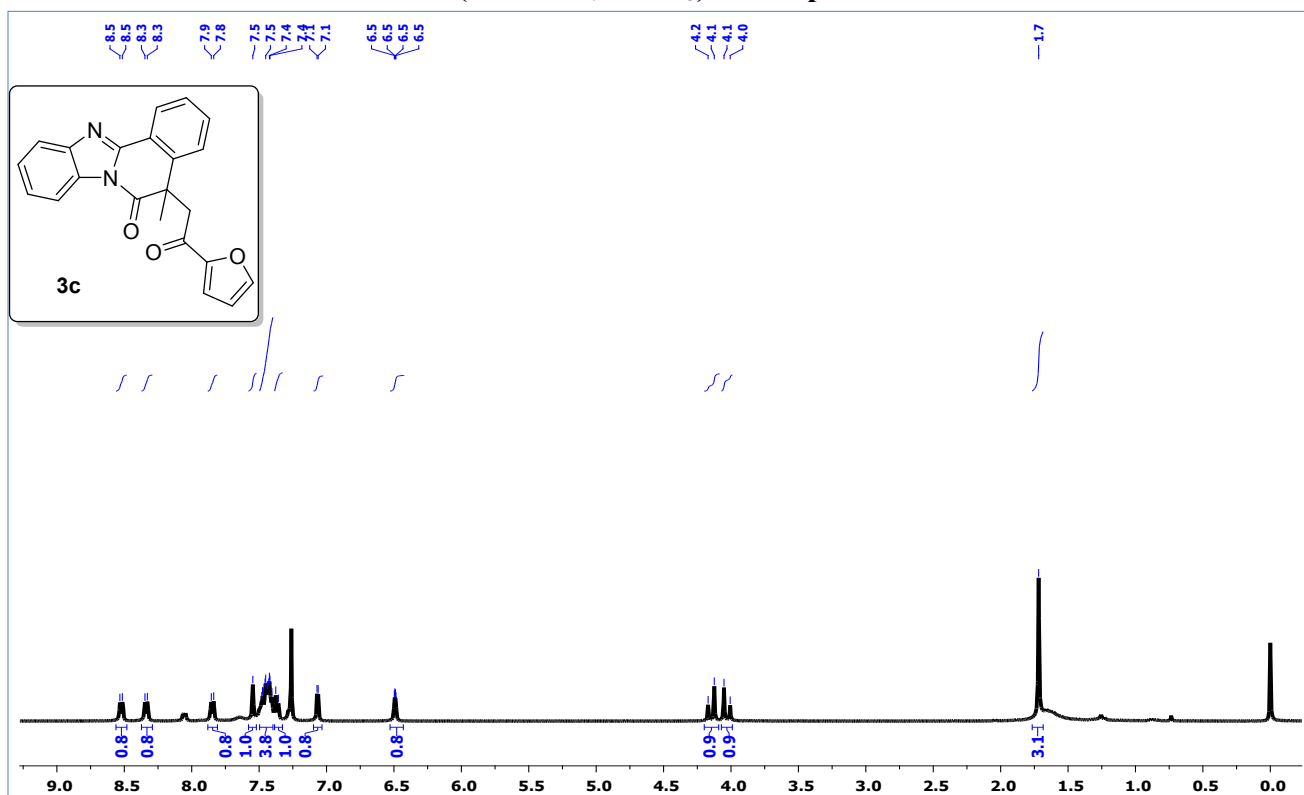

<sup>13</sup>C NMR (126 MHz, CDCl<sub>3</sub>) of compound 3c

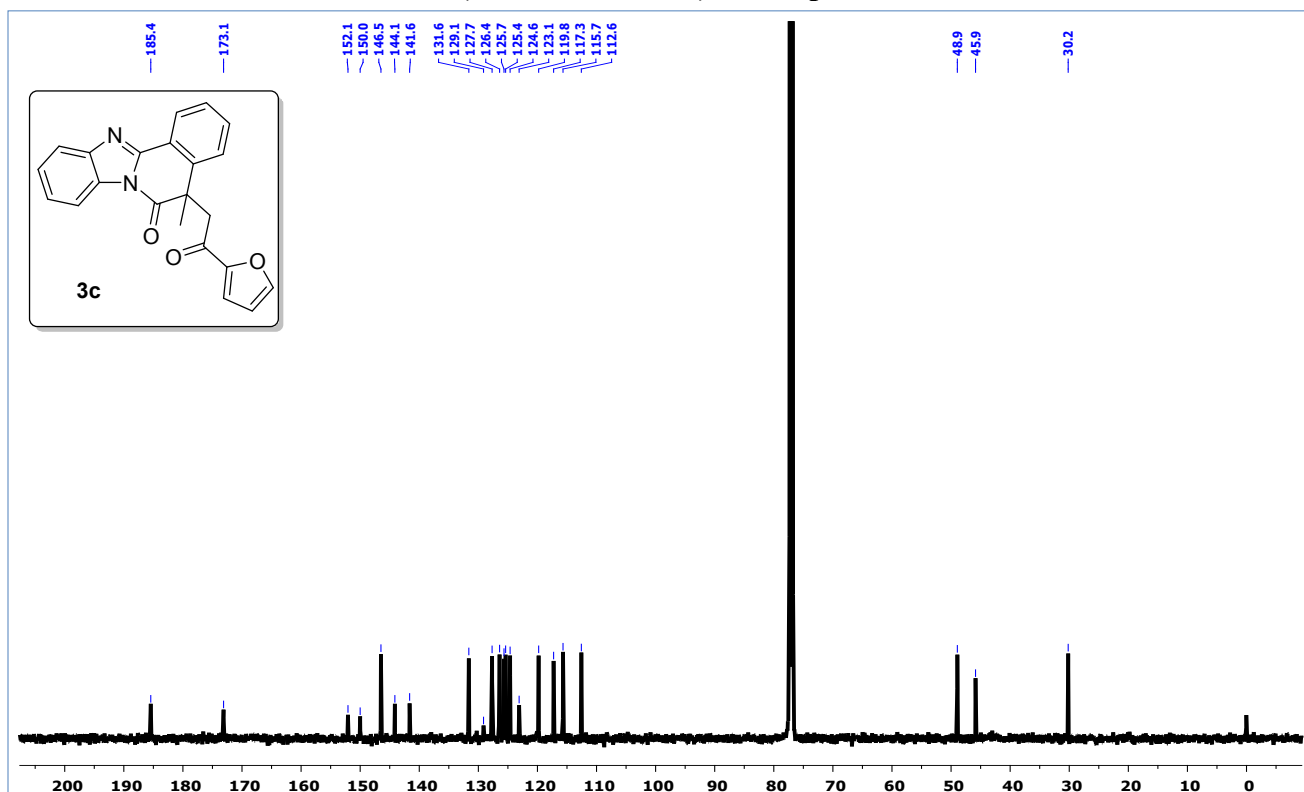

**<sup>1</sup>H NMR (400 MHz, CDCl<sub>3</sub>) of compound 3d**

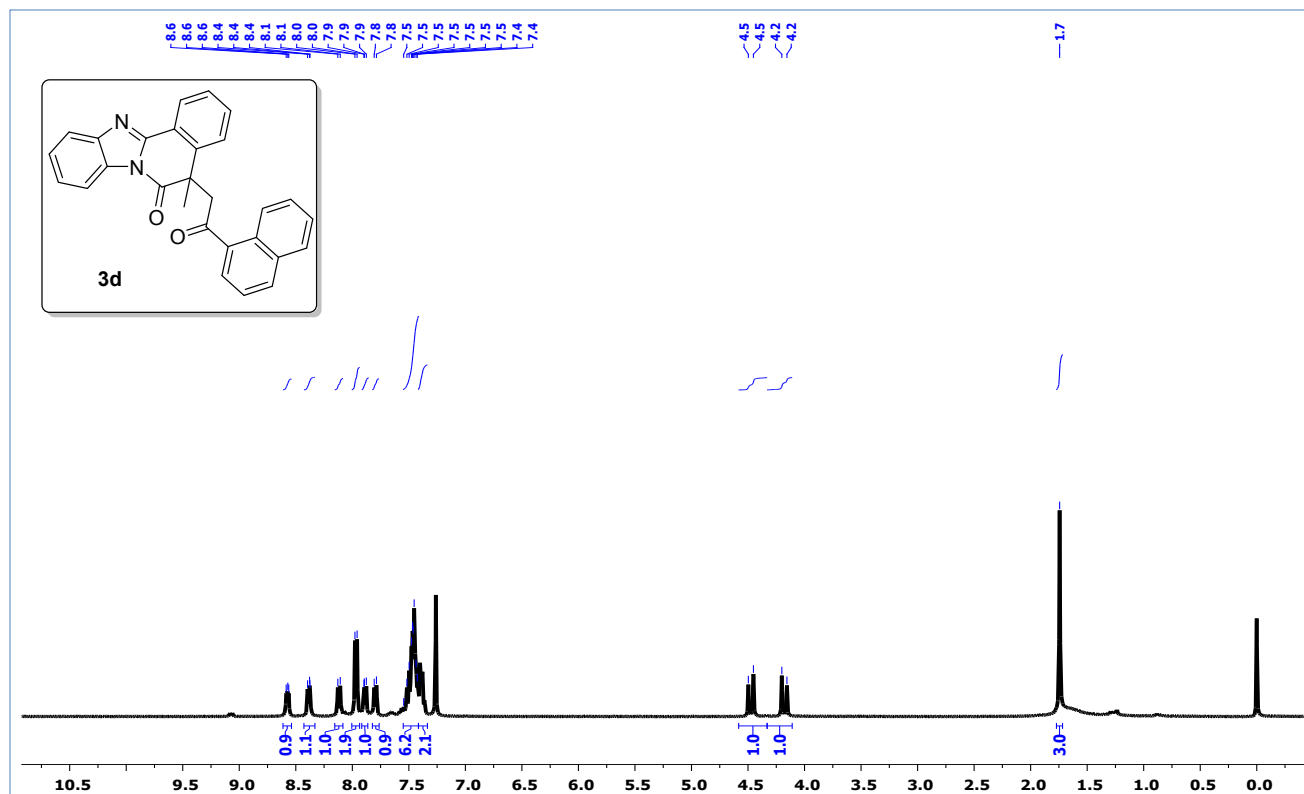

**<sup>13</sup>C NMR (126 MHz, CDCl<sub>3</sub>) of compound 3d**

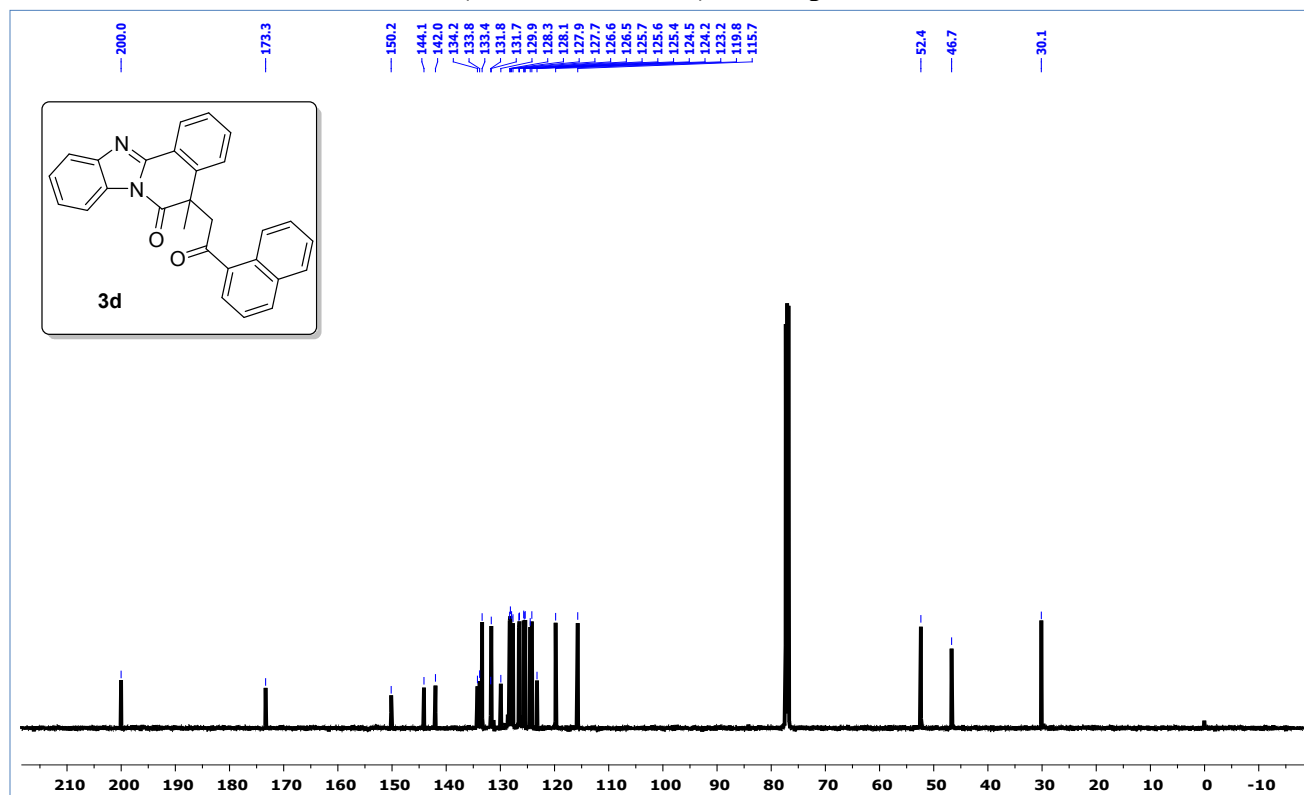

<sup>1</sup>H NMR (500 MHz, CDCl<sub>3</sub>) of compound 3e

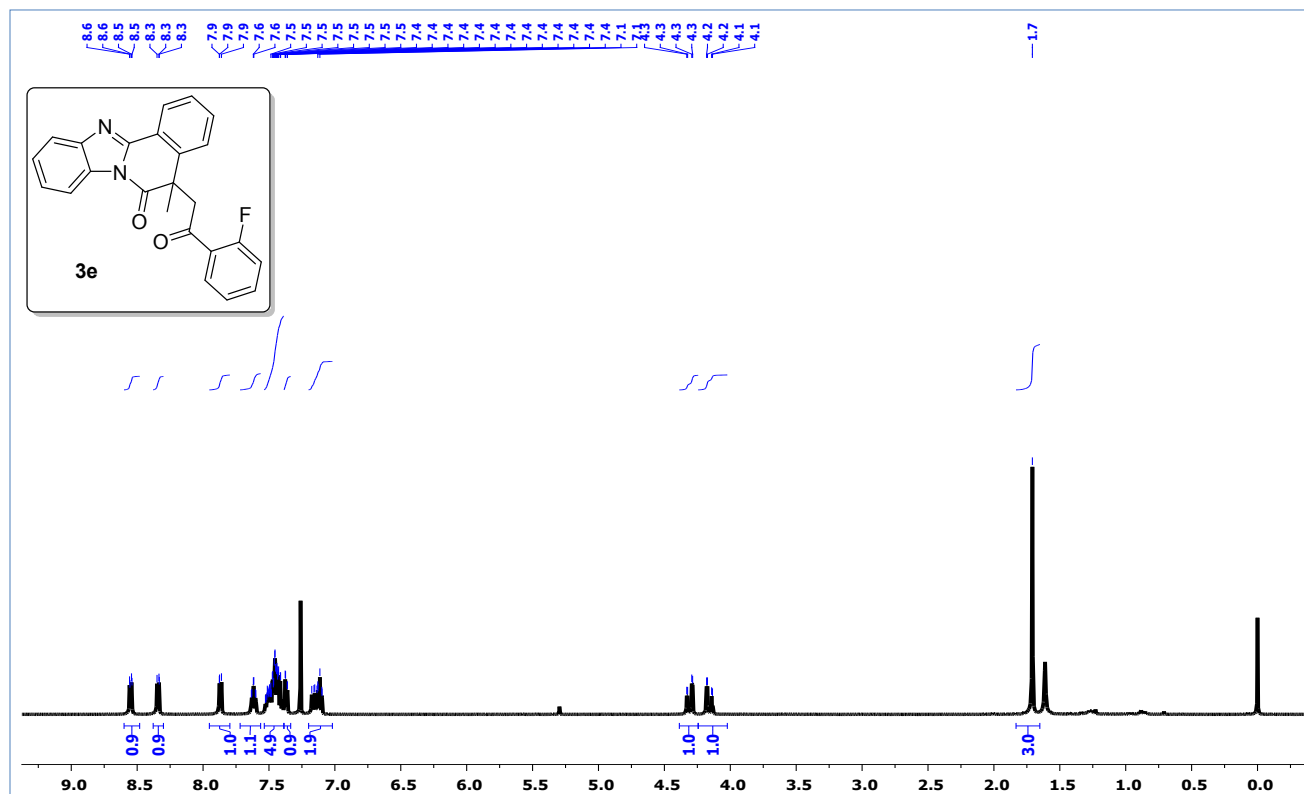

<sup>13</sup>C NMR (100 MHz, CDCl<sub>3</sub>) of compound 3e

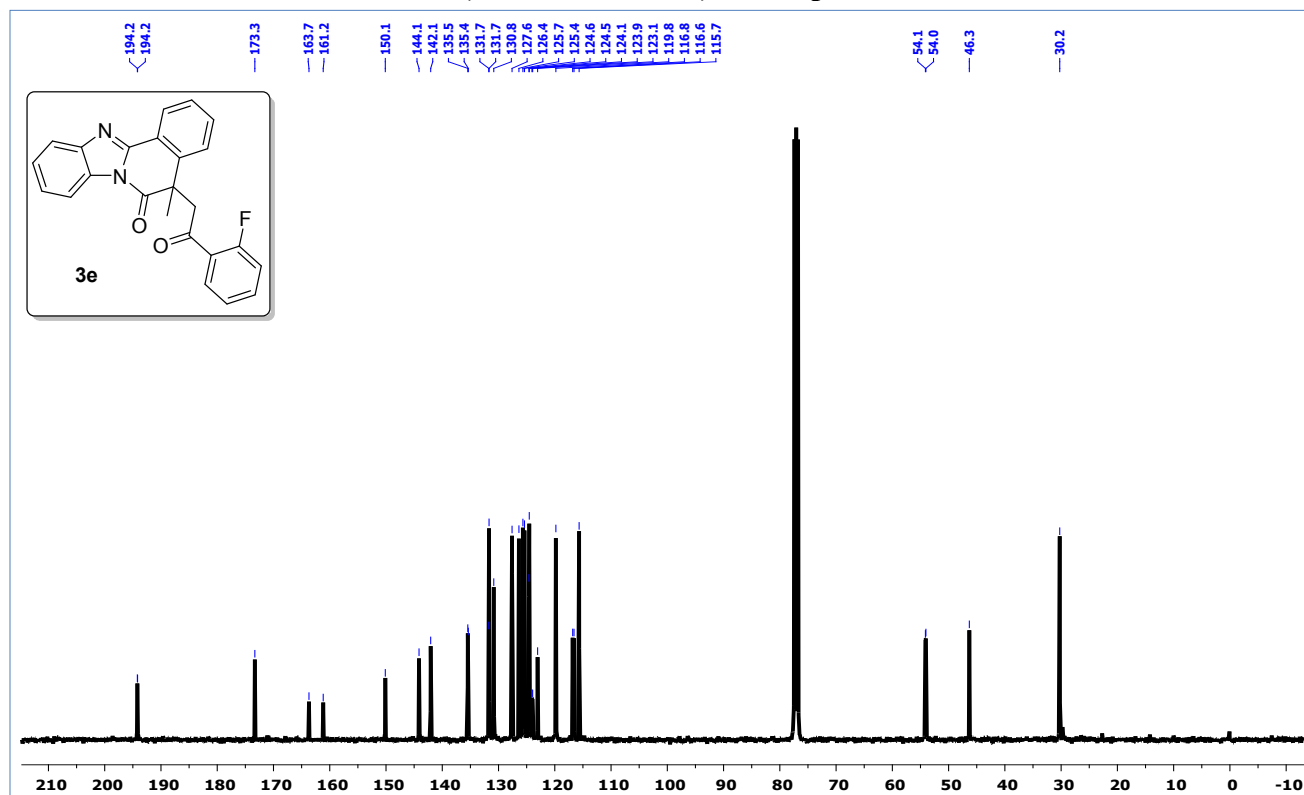

<sup>1</sup>H NMR (400 MHz, CDCl<sub>3</sub>) of compound 3f

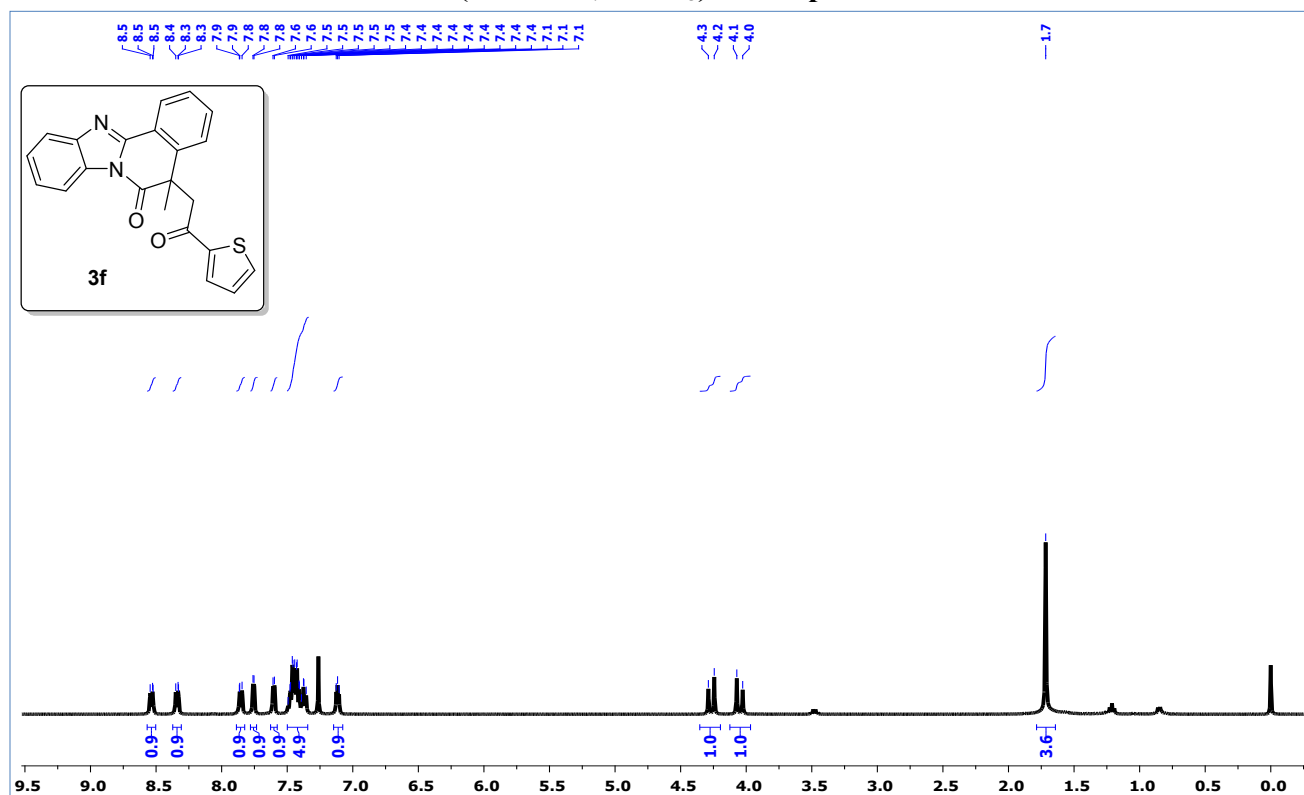

<sup>13</sup>C NMR (100 MHz, CDCl<sub>3</sub>) of compound 3f

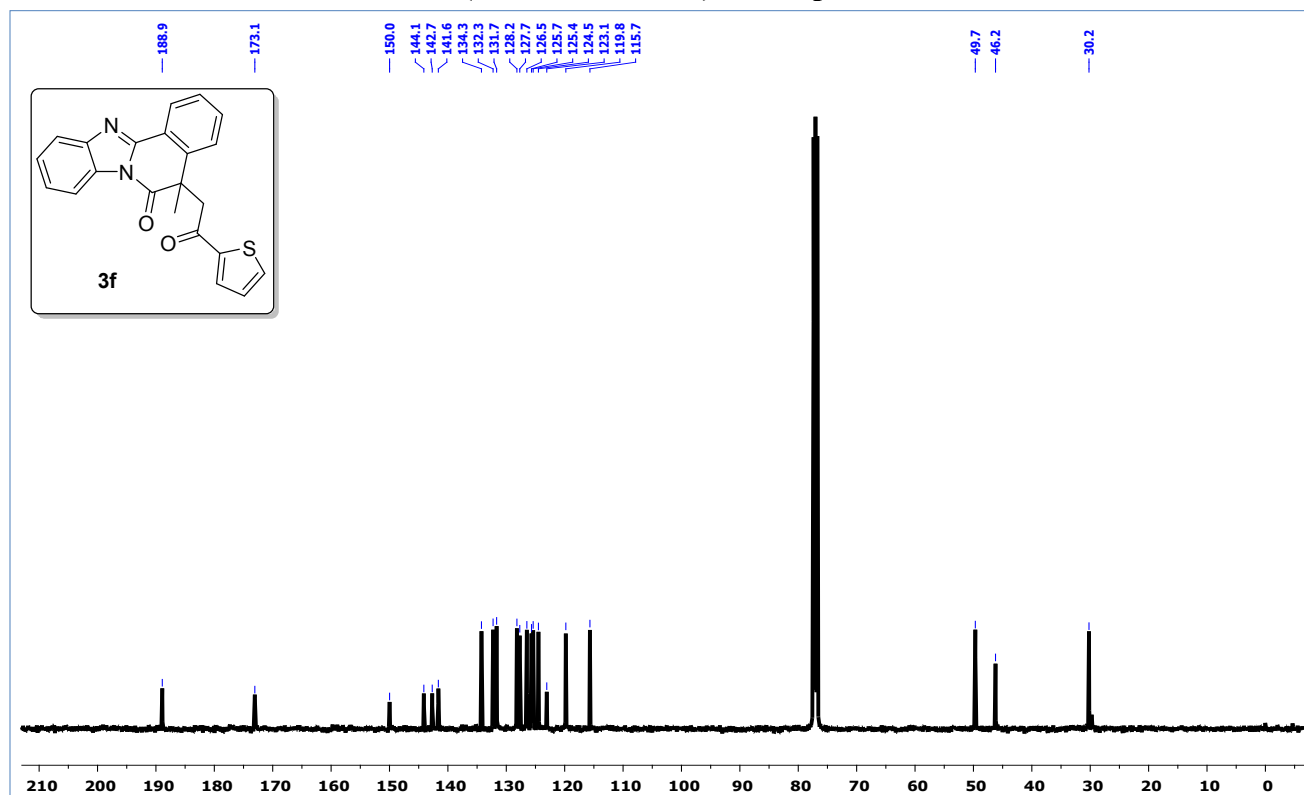







**<sup>1</sup>H NMR (300 MHz, CDCl<sub>3</sub>) of compound 3i**

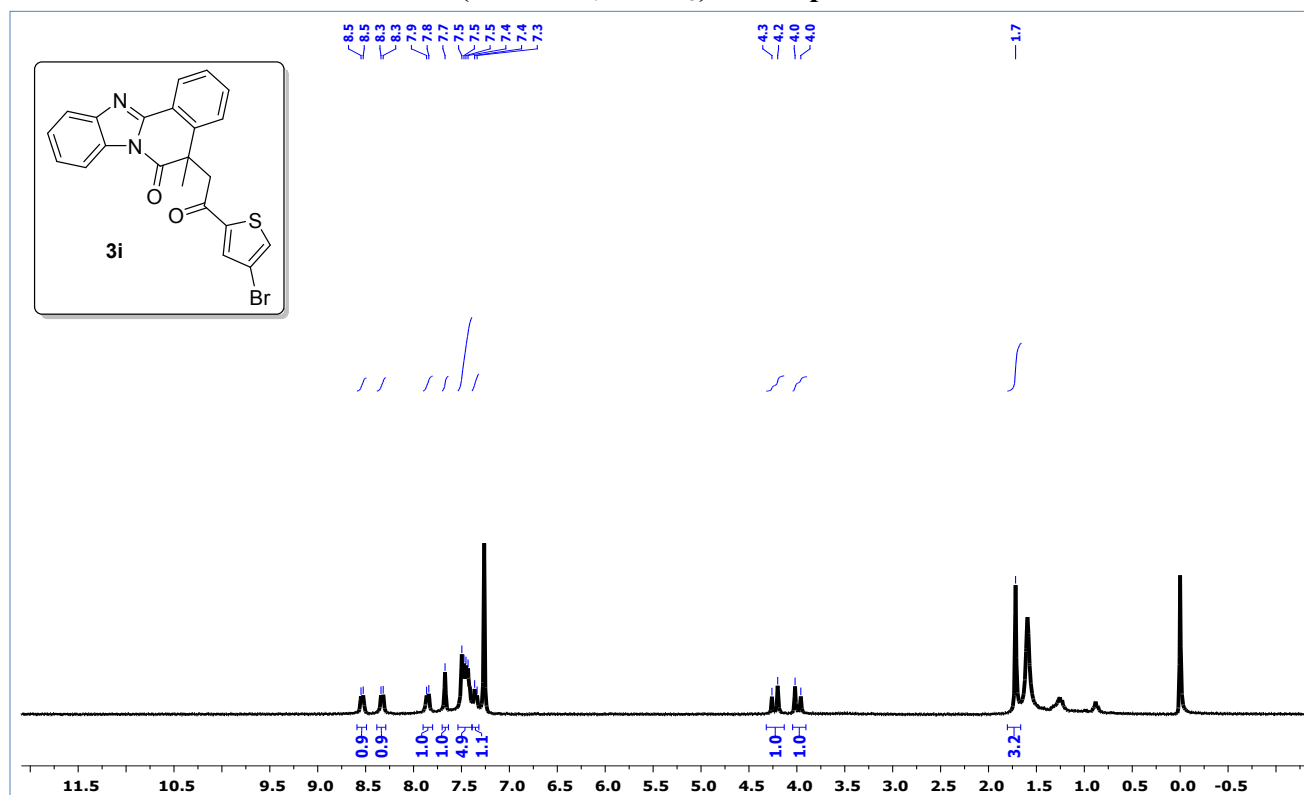

**<sup>13</sup>C NMR (126 MHz, CDCl<sub>3</sub>) of compound 3i**

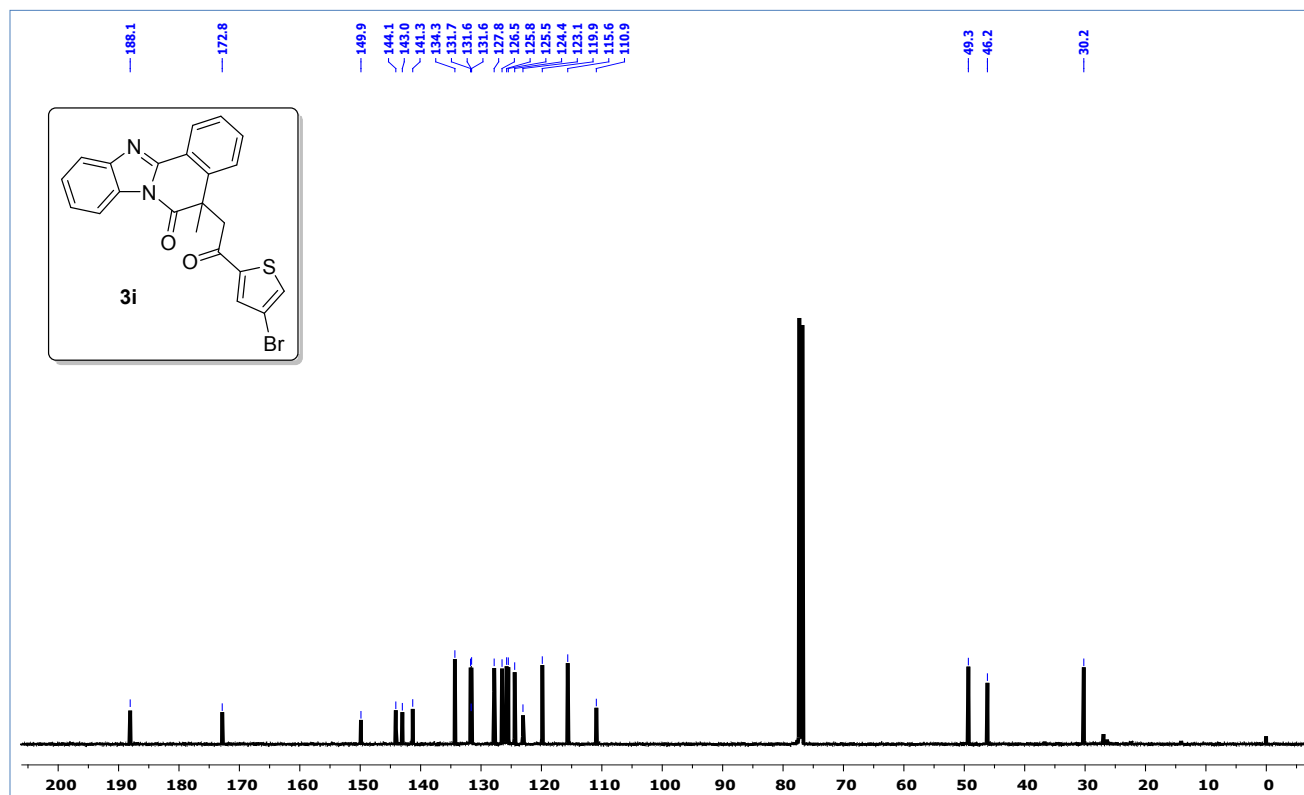



<sup>1</sup>H NMR (400 MHz, CDCl<sub>3</sub>) of compound 3k

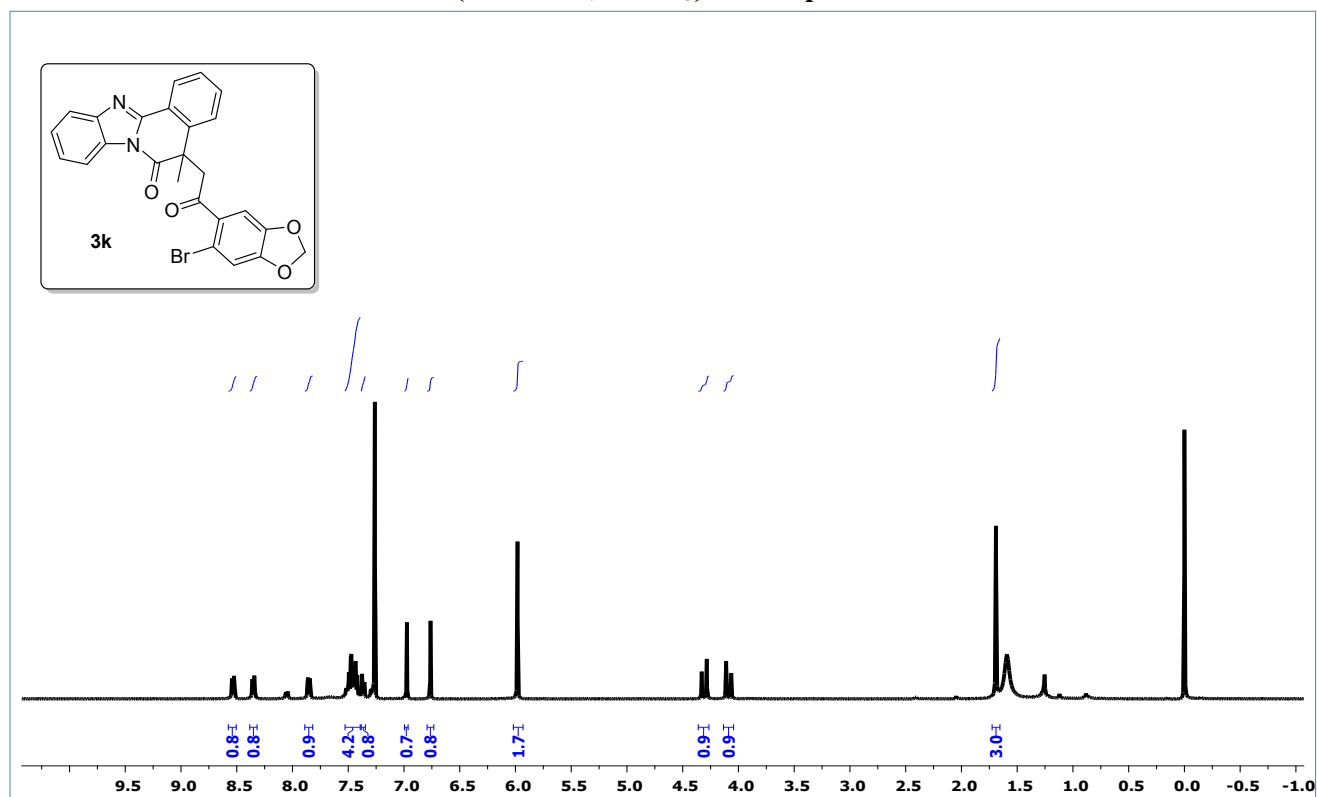

<sup>13</sup>C NMR (100 MHz, CDCl<sub>3</sub>) of compound 3k

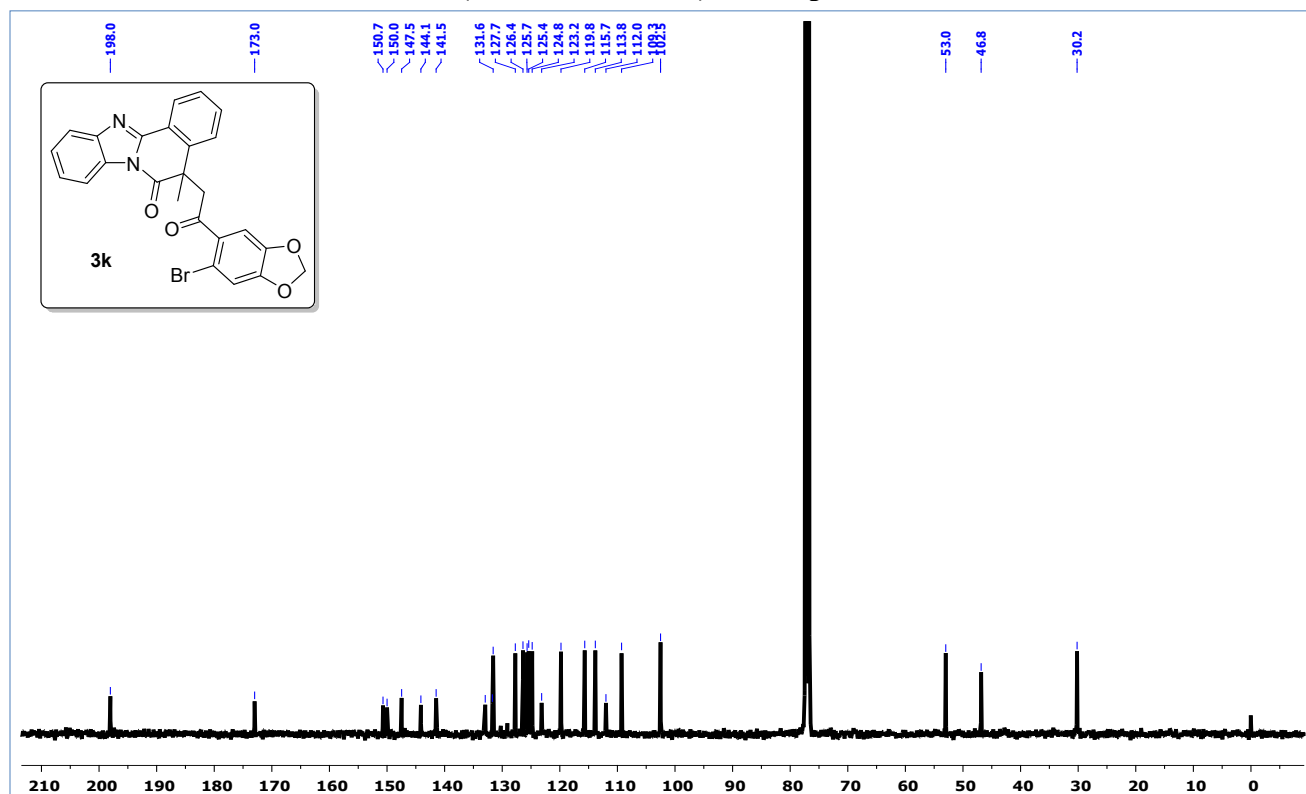

<sup>1</sup>H NMR (400 MHz, CDCl<sub>3</sub>) of compound 3I

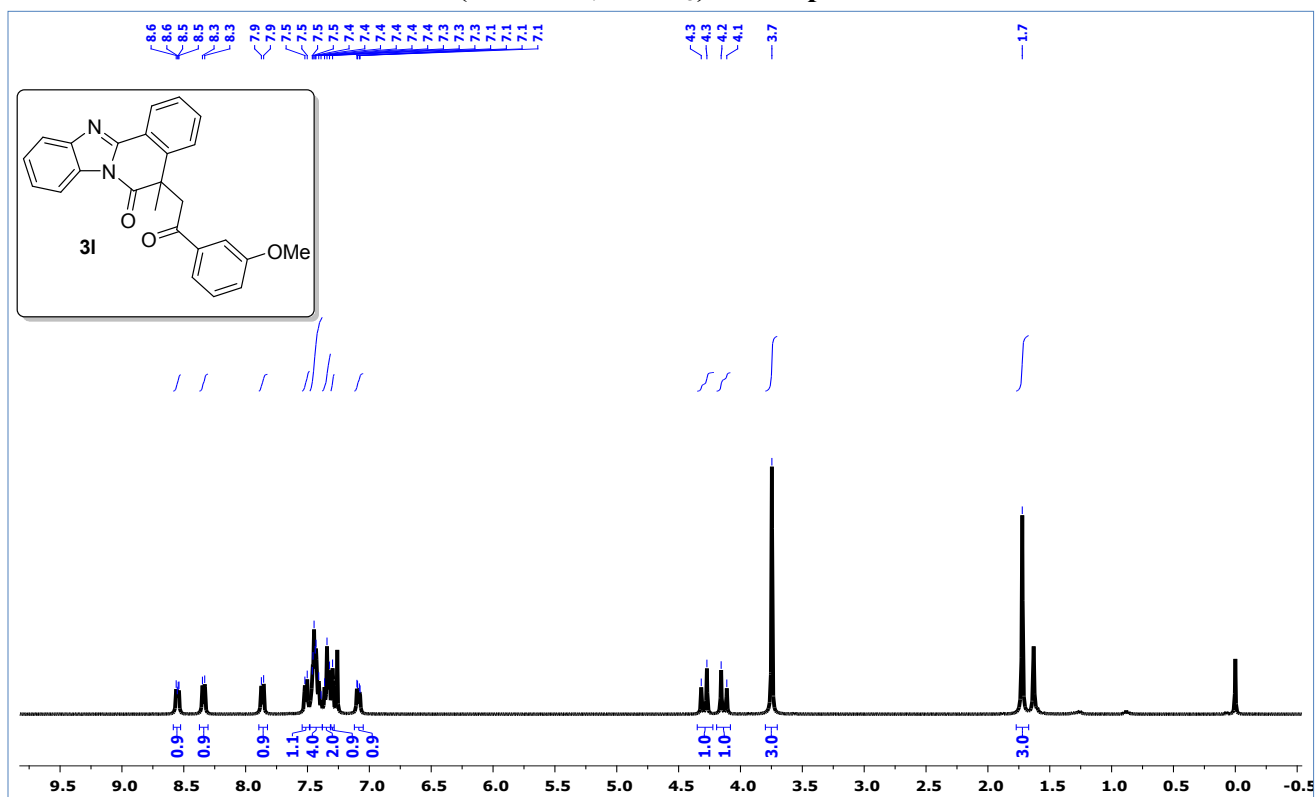

<sup>13</sup>C NMR (126 MHz, CDCl<sub>3</sub>) compound 3I

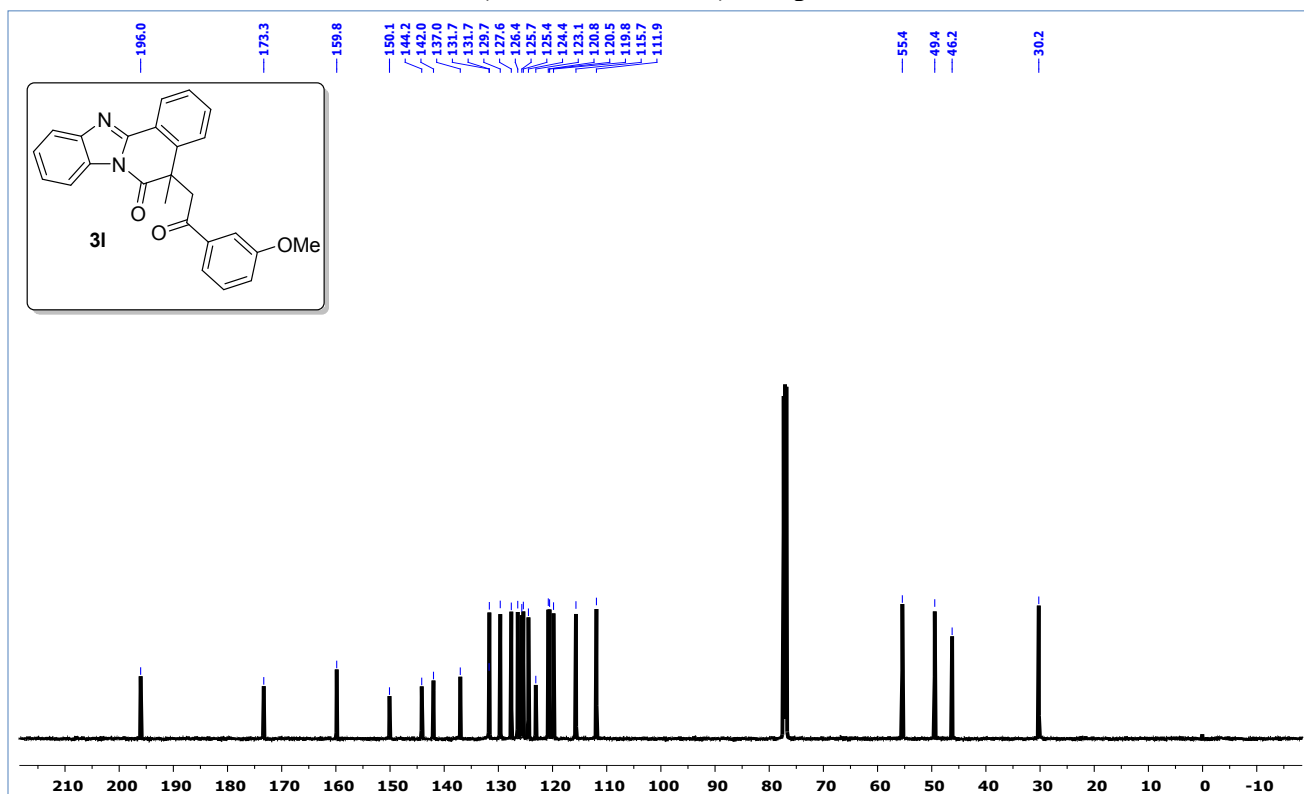

**<sup>1</sup>H NMR (400 MHz, CDCl<sub>3</sub>) of compound 3m**

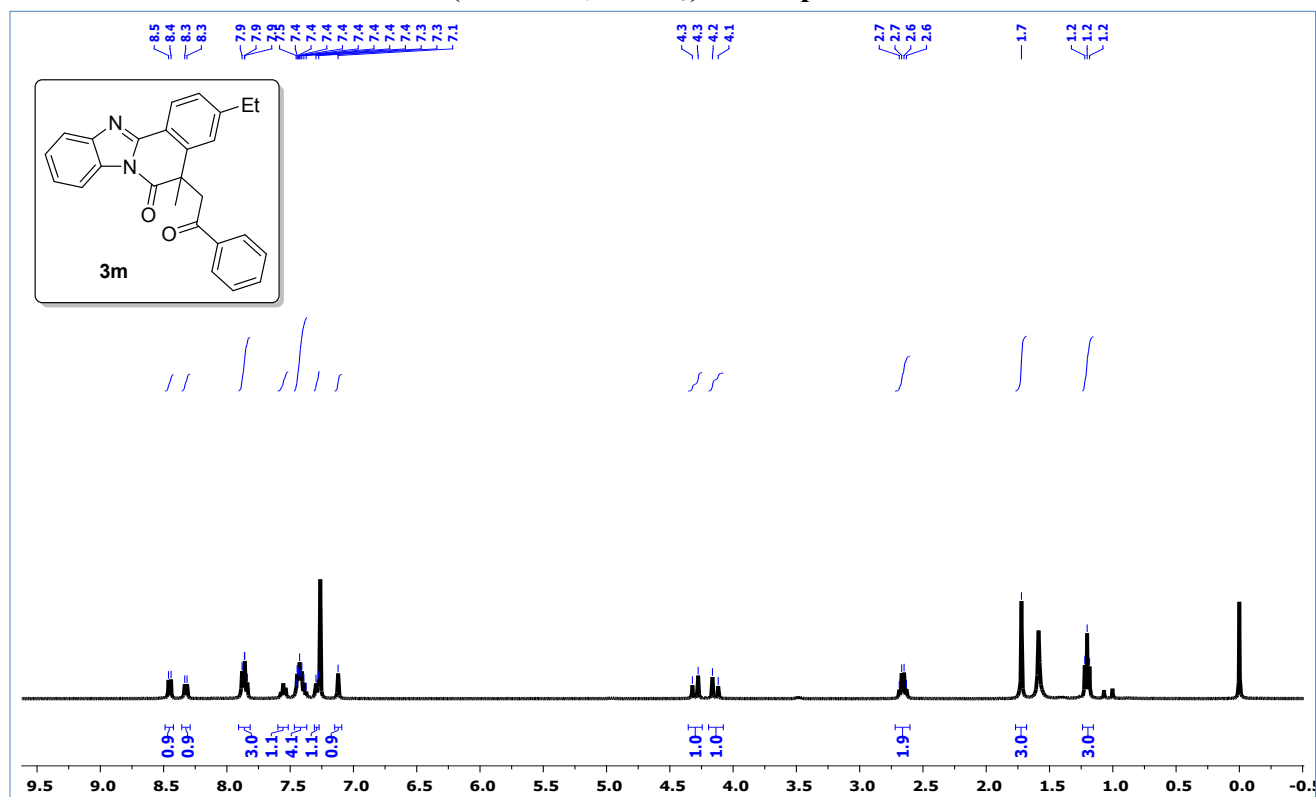

**<sup>13</sup>C NMR (126 MHz, CDCl<sub>3</sub>) of compound 3m**

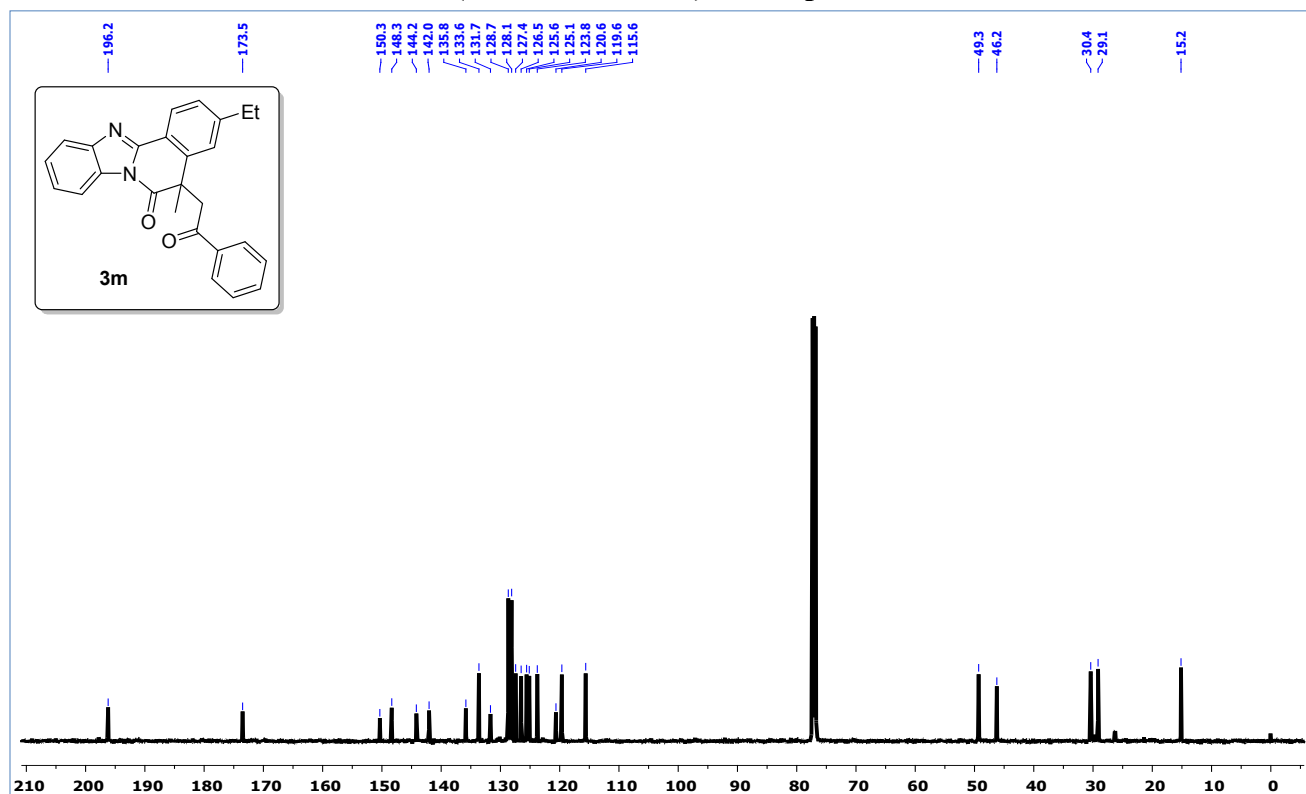

<sup>1</sup>H NMR (400 MHz, CDCl<sub>3</sub>) of compound 3n

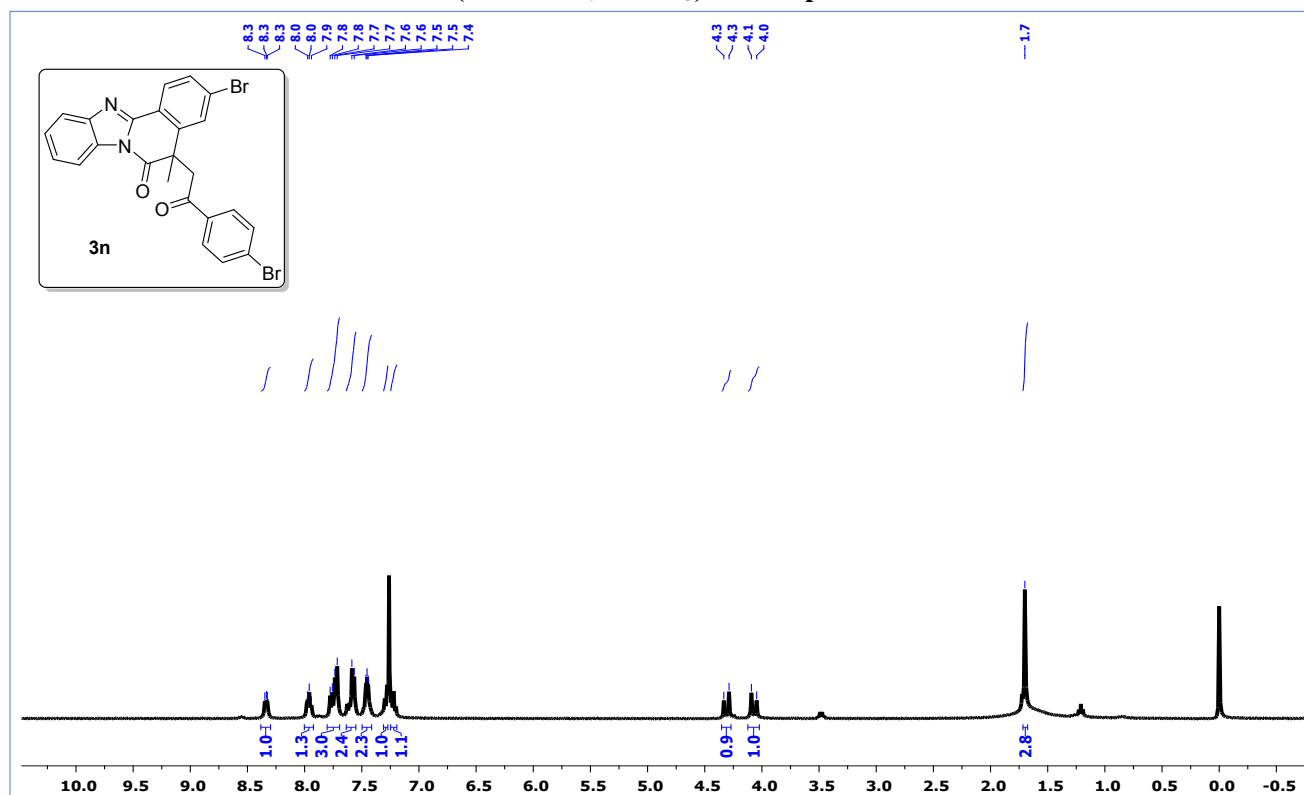

<sup>13</sup>C NMR (100 MHz, CDCl<sub>3</sub>) of compound 3n

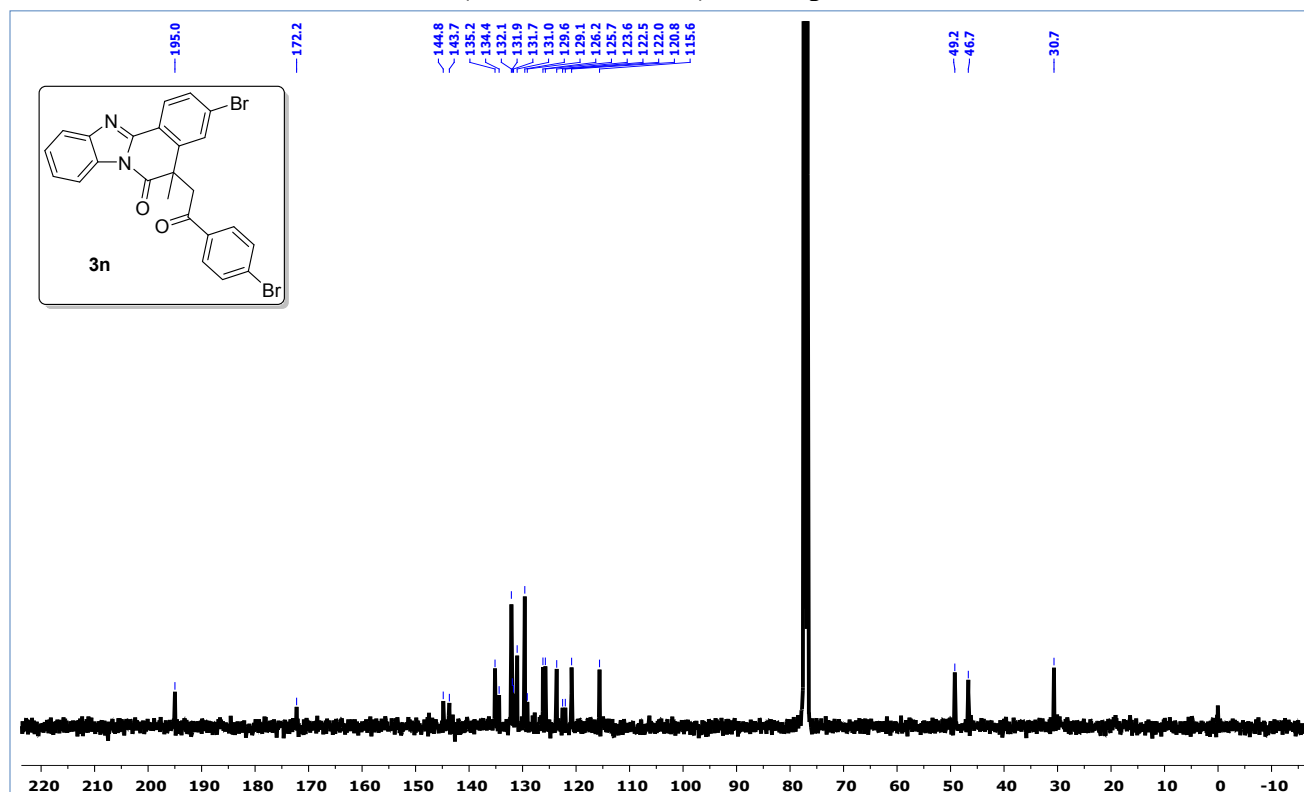

### <sup>1</sup>H NMR (400 MHz, CDCl<sub>3</sub>) of compound 3o

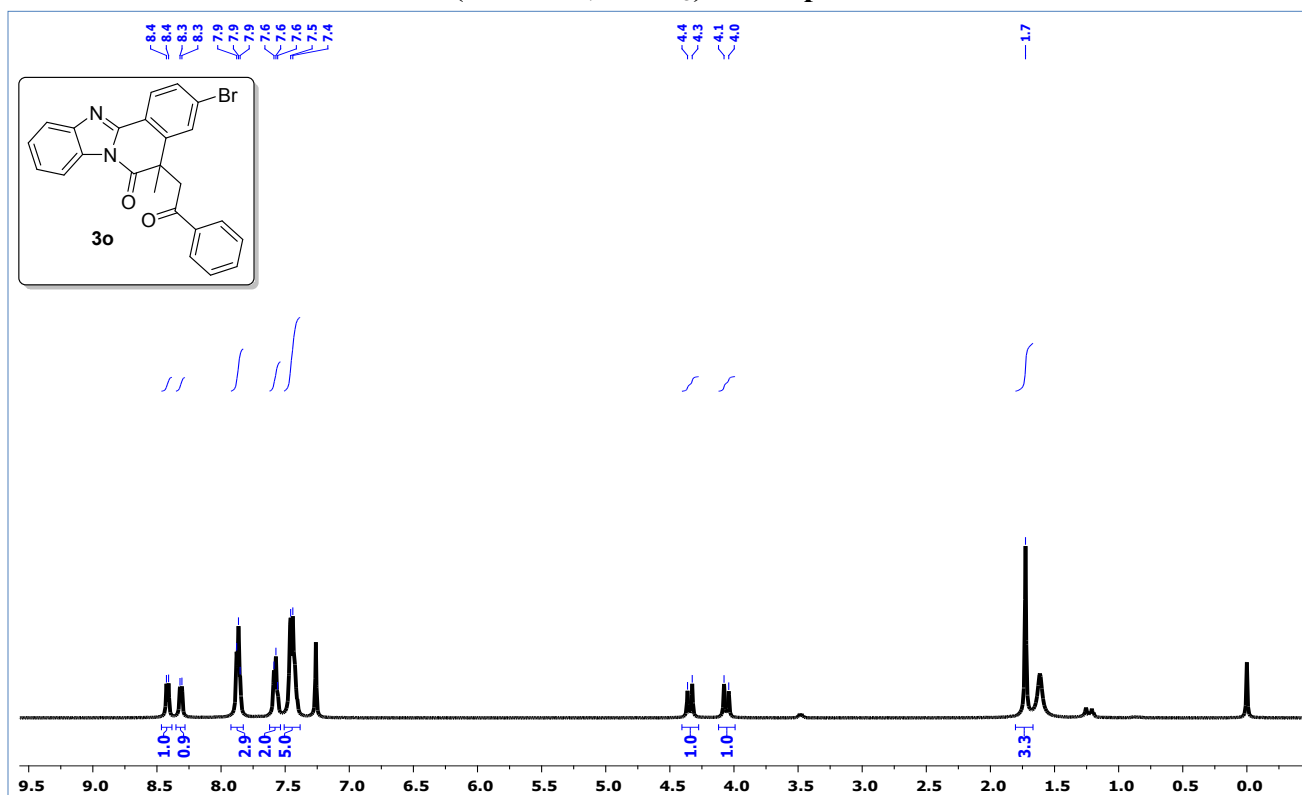

### <sup>13</sup>C NMR (100 MHz, CDCl<sub>3</sub>) of compound 3o

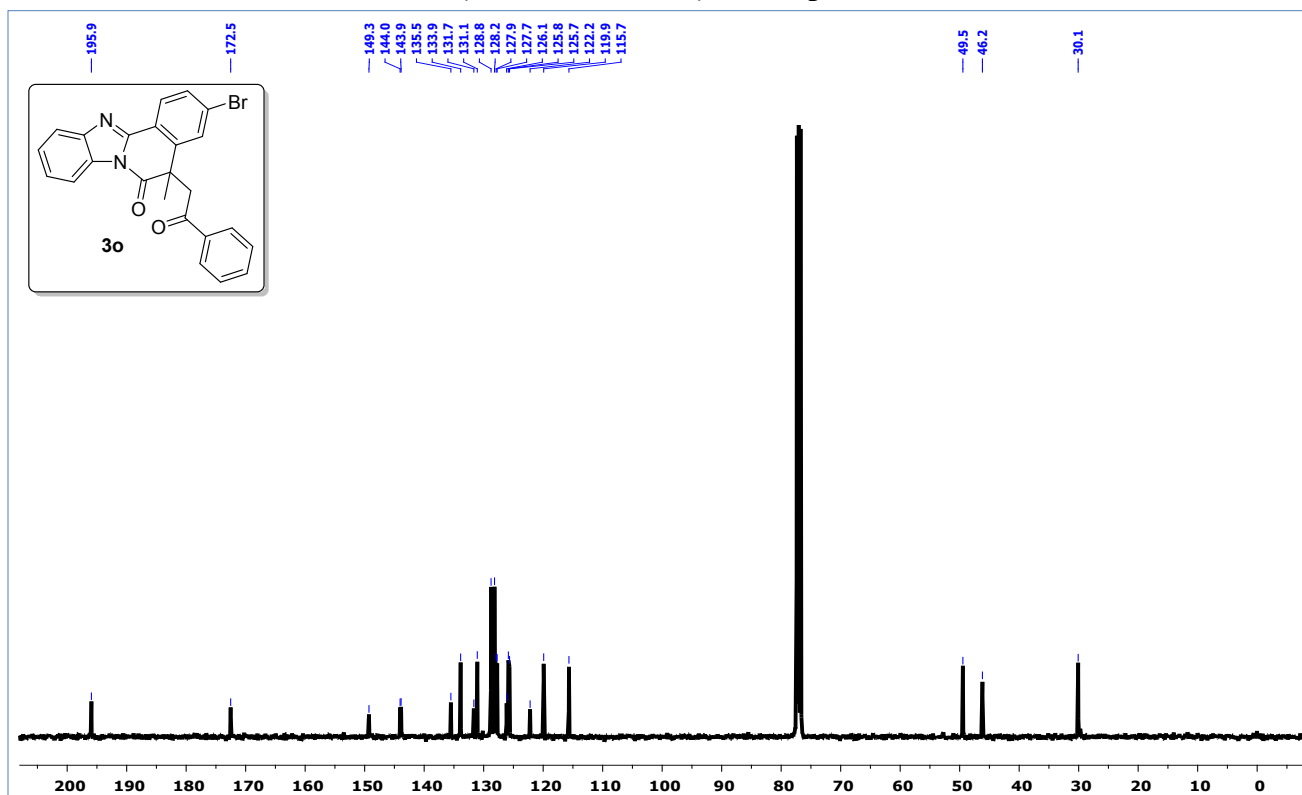



### <sup>1</sup>H NMR (400 MHz, CDCl<sub>3</sub>) of compound 3p

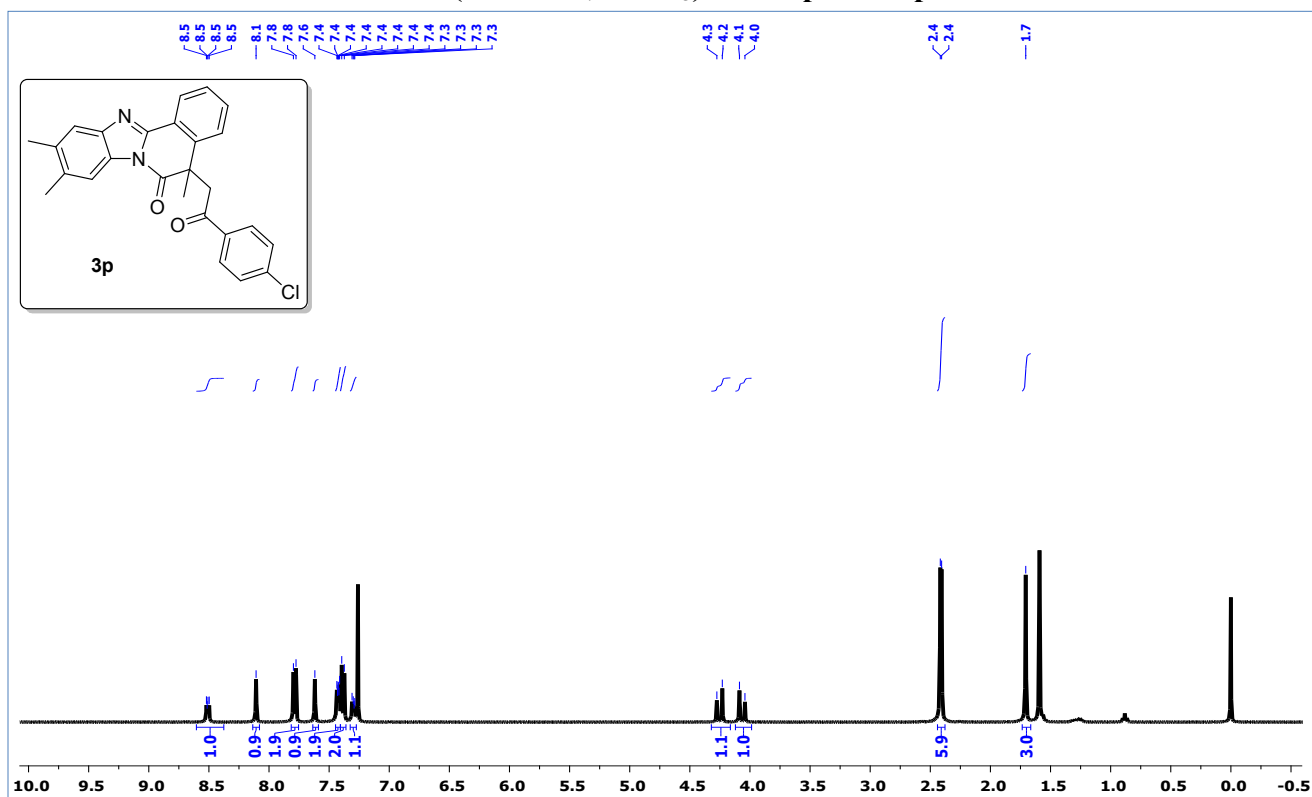

### <sup>13</sup>C NMR (126 MHz, CDCl<sub>3</sub>) of compound 3p

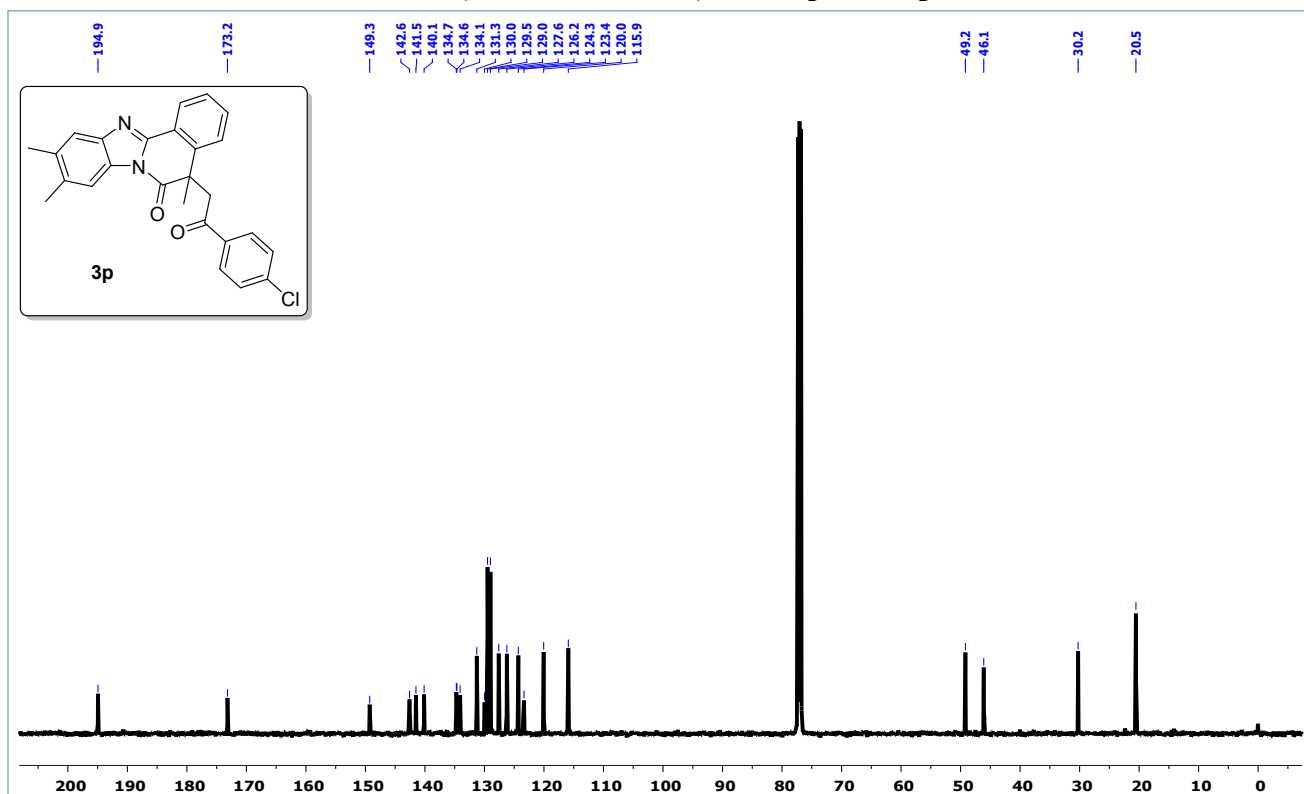

<sup>1</sup>H NMR (500 MHz, CDCl<sub>3</sub>) of compound 3q

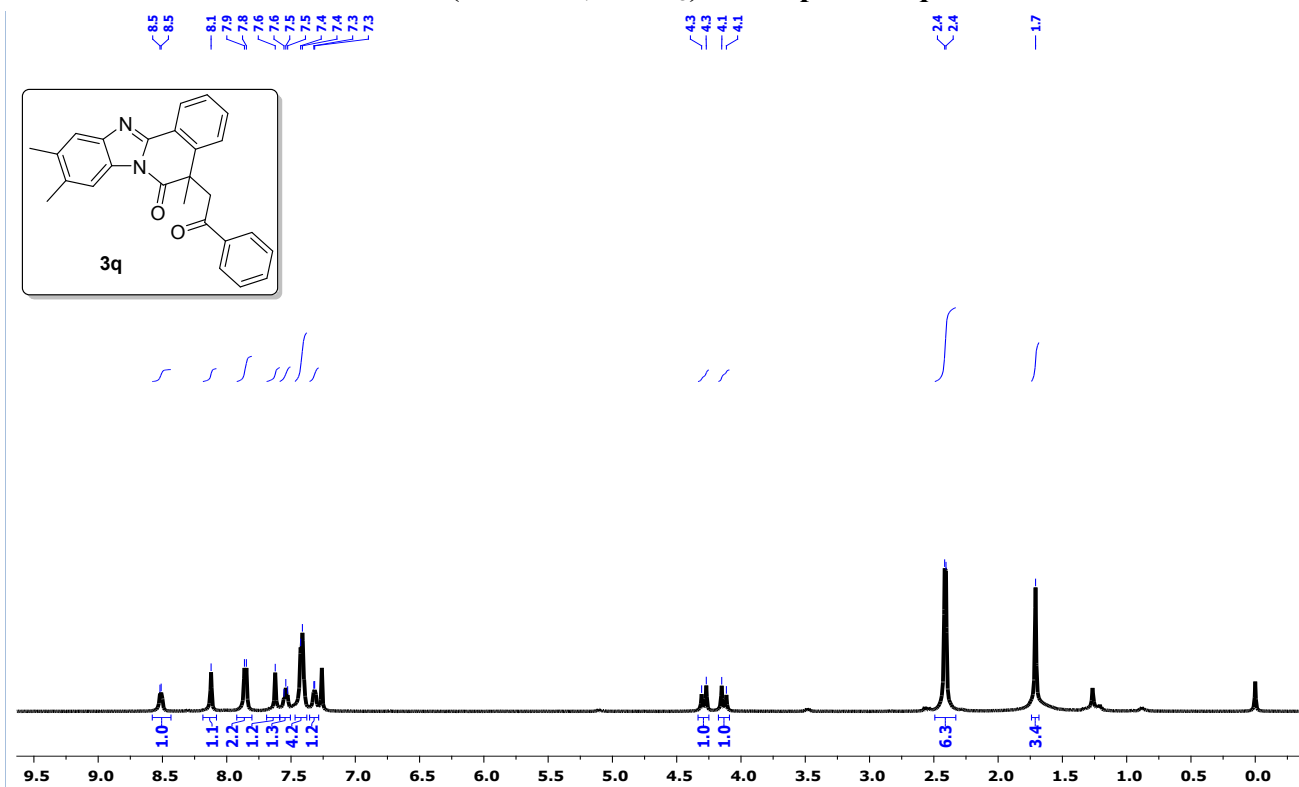

<sup>13</sup>C NMR (100 MHz, CDCl<sub>3</sub>) of compound 3q

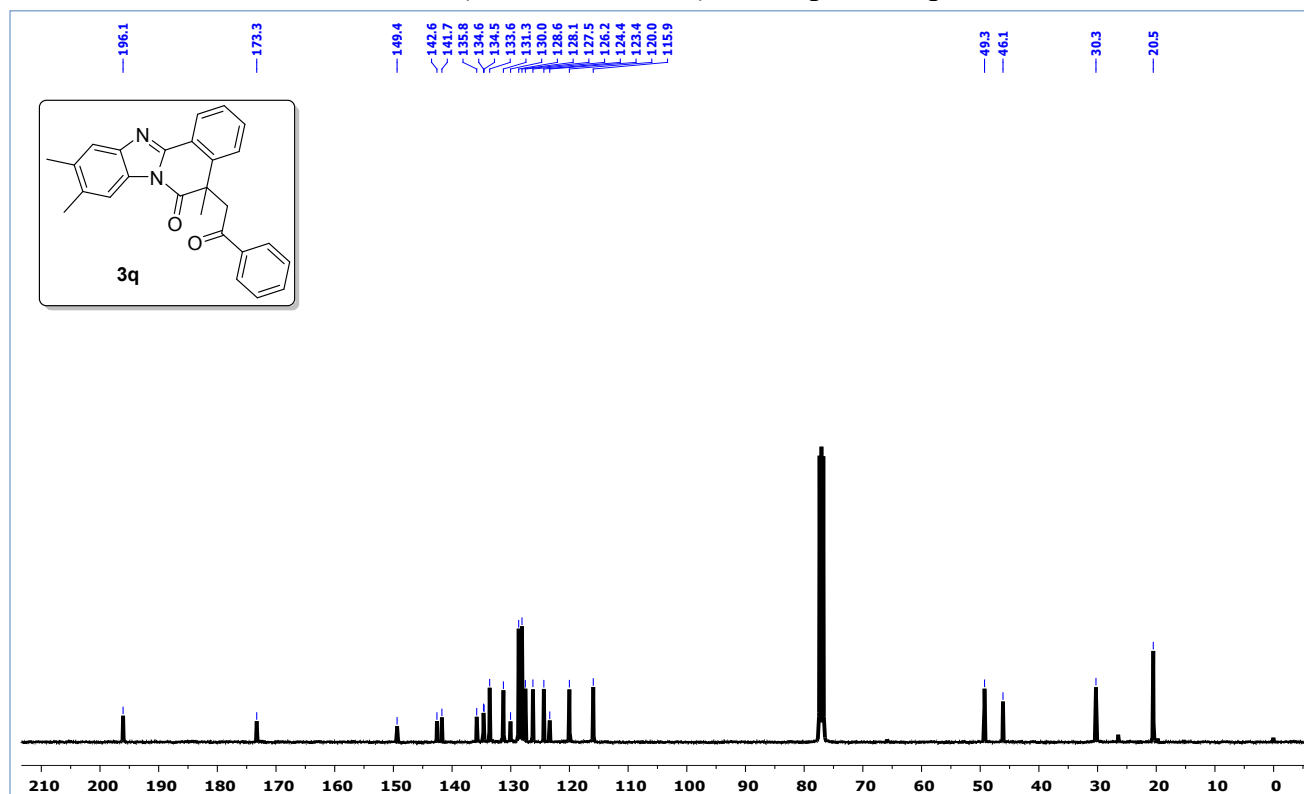

<sup>1</sup>H NMR (400 MHz, CDCl<sub>3</sub>) of compound 3r

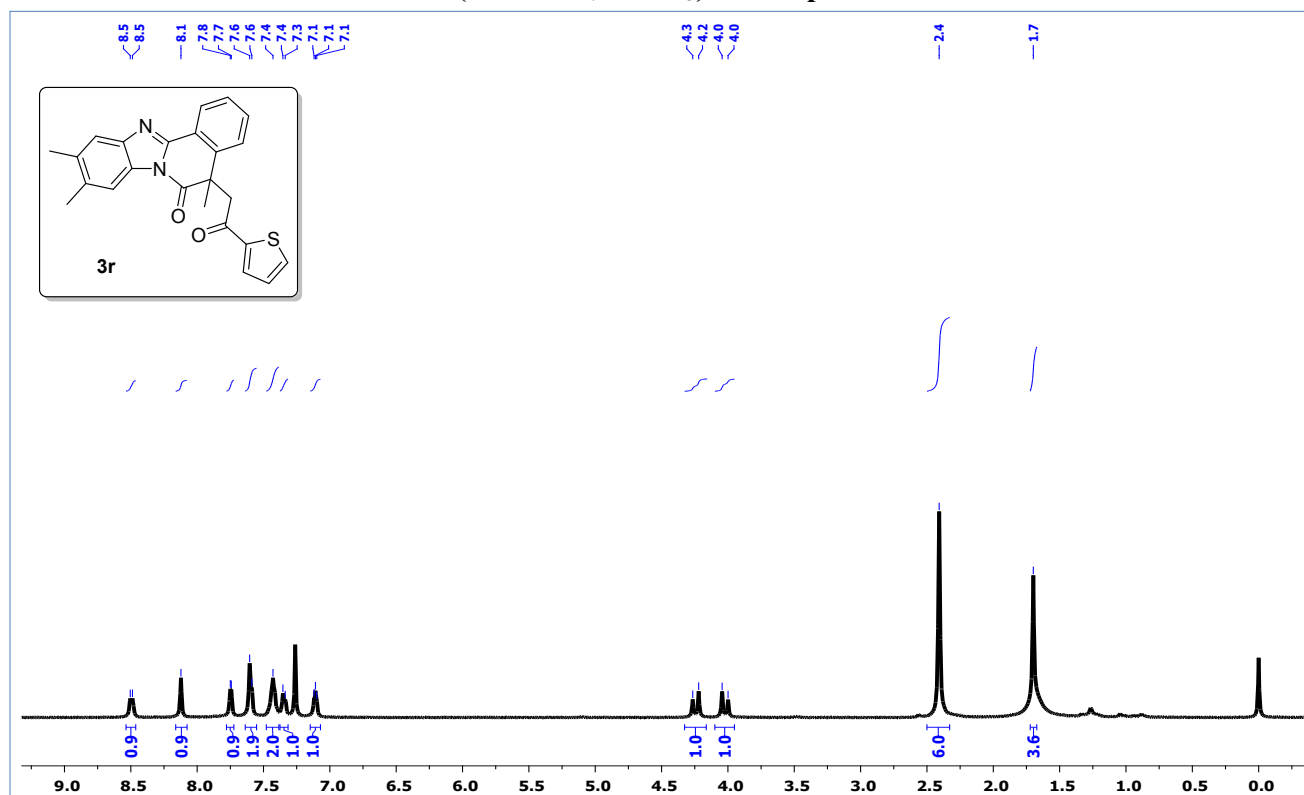

<sup>13</sup>C NMR (100 MHz, CDCl<sub>3</sub>) of compound 3r

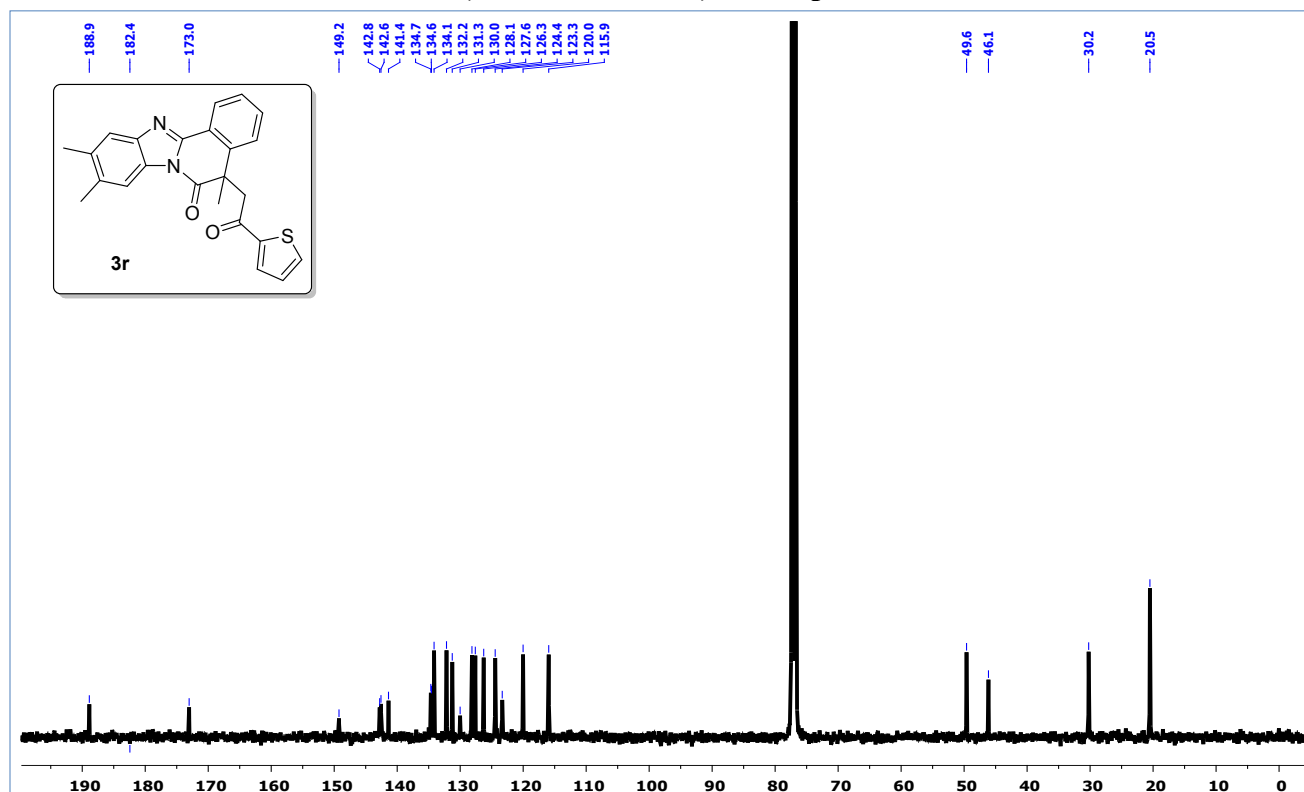

**<sup>1</sup>H NMR (400 MHz, CDCl<sub>3</sub>) of compound 3s**

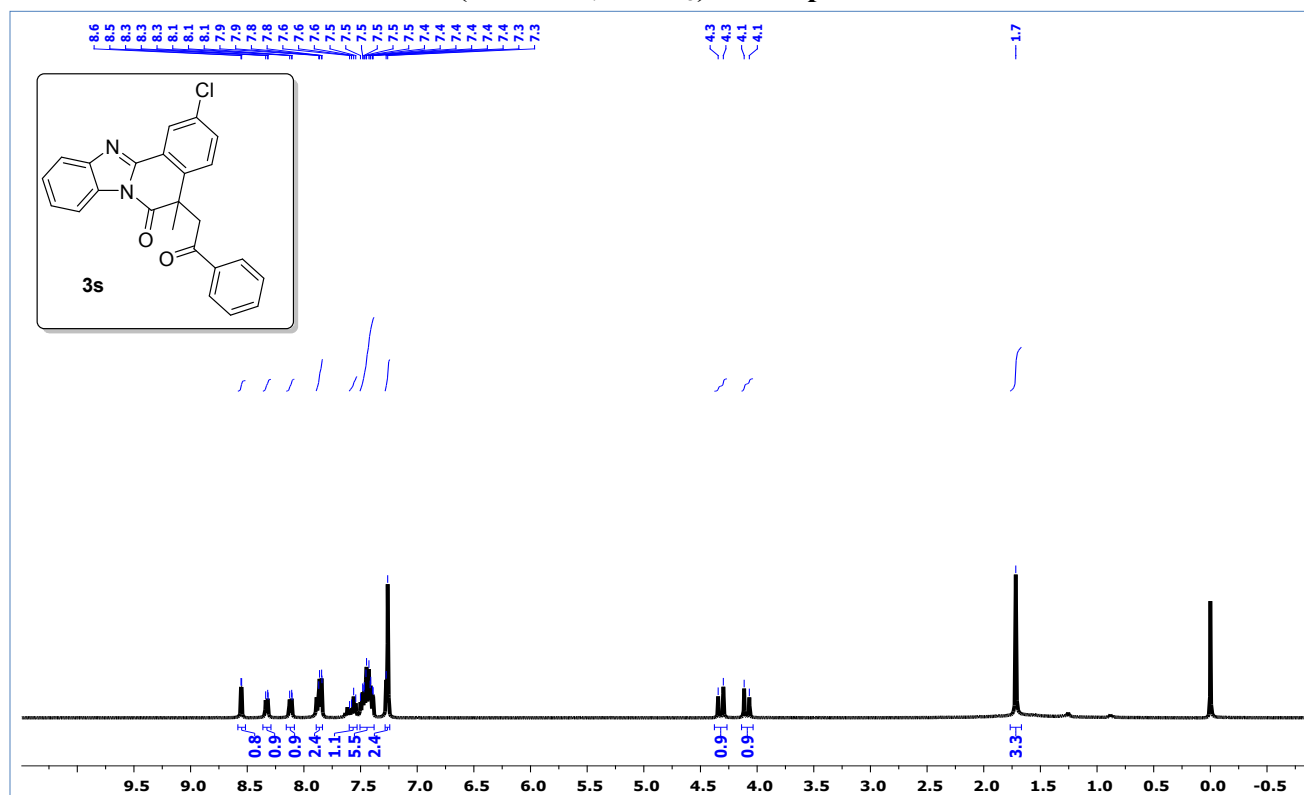

**<sup>13</sup>C NMR (126 MHz, CDCl<sub>3</sub>) of compound 3s**

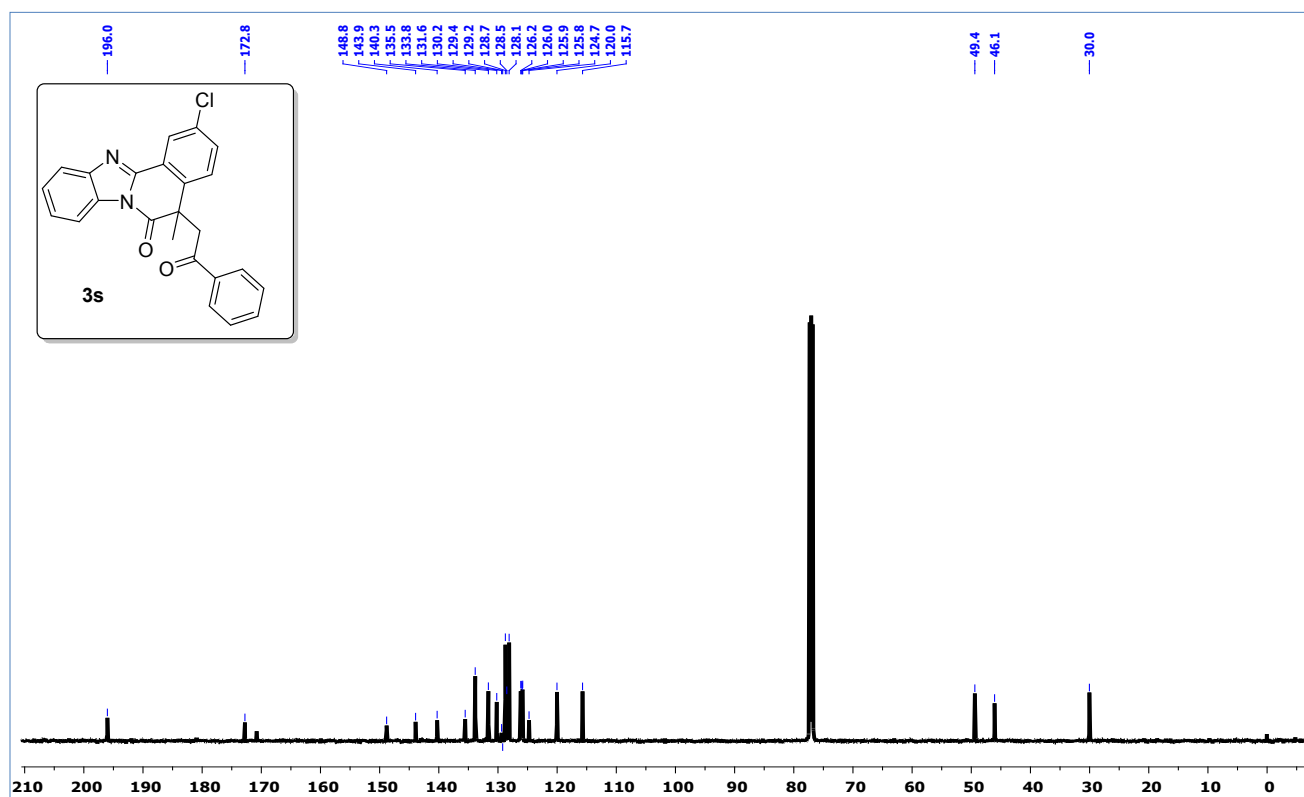

**<sup>1</sup>H NMR (400 MHz, CDCl<sub>3</sub>) of compound 3t**

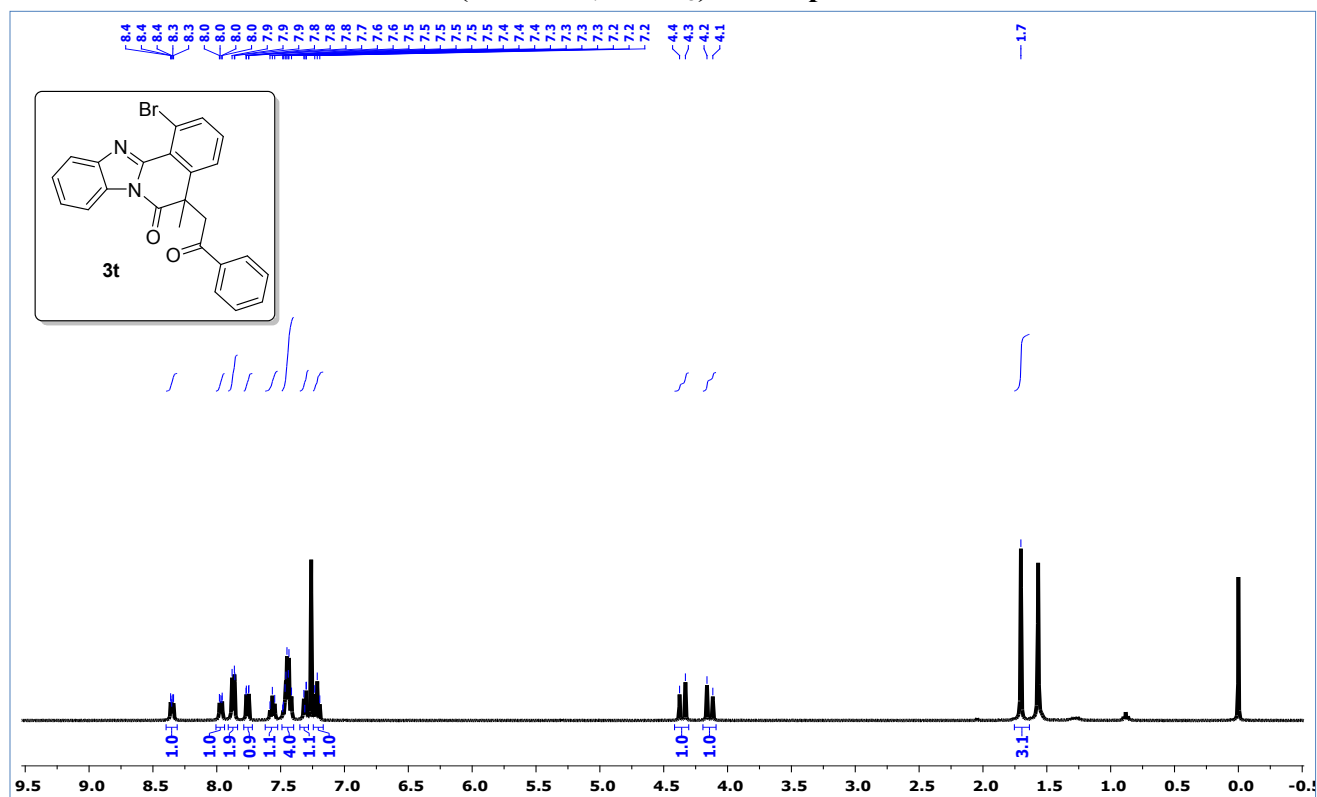

**<sup>13</sup>C NMR (100 MHz, CDCl<sub>3</sub>) of compound 3t**

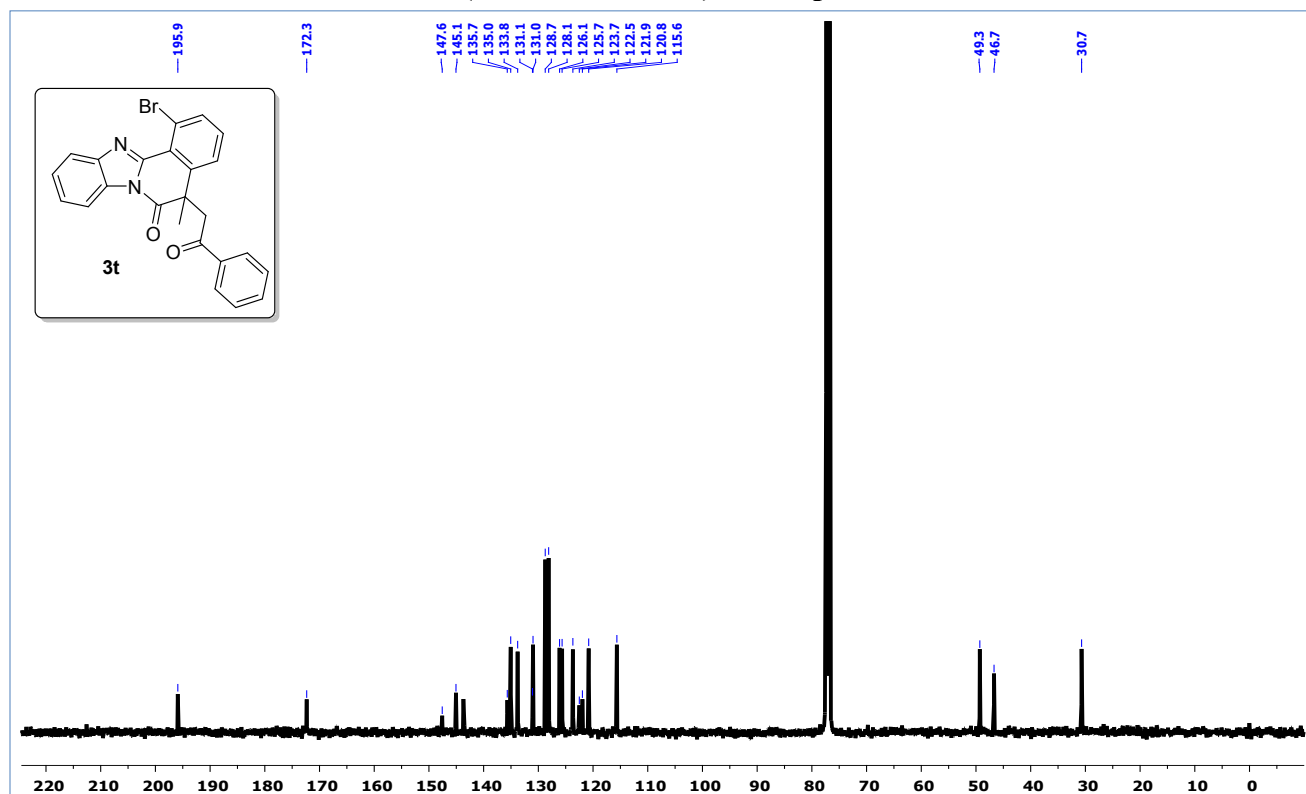

**<sup>1</sup>H NMR (400 MHz, CDCl<sub>3</sub>) of compound 3u**

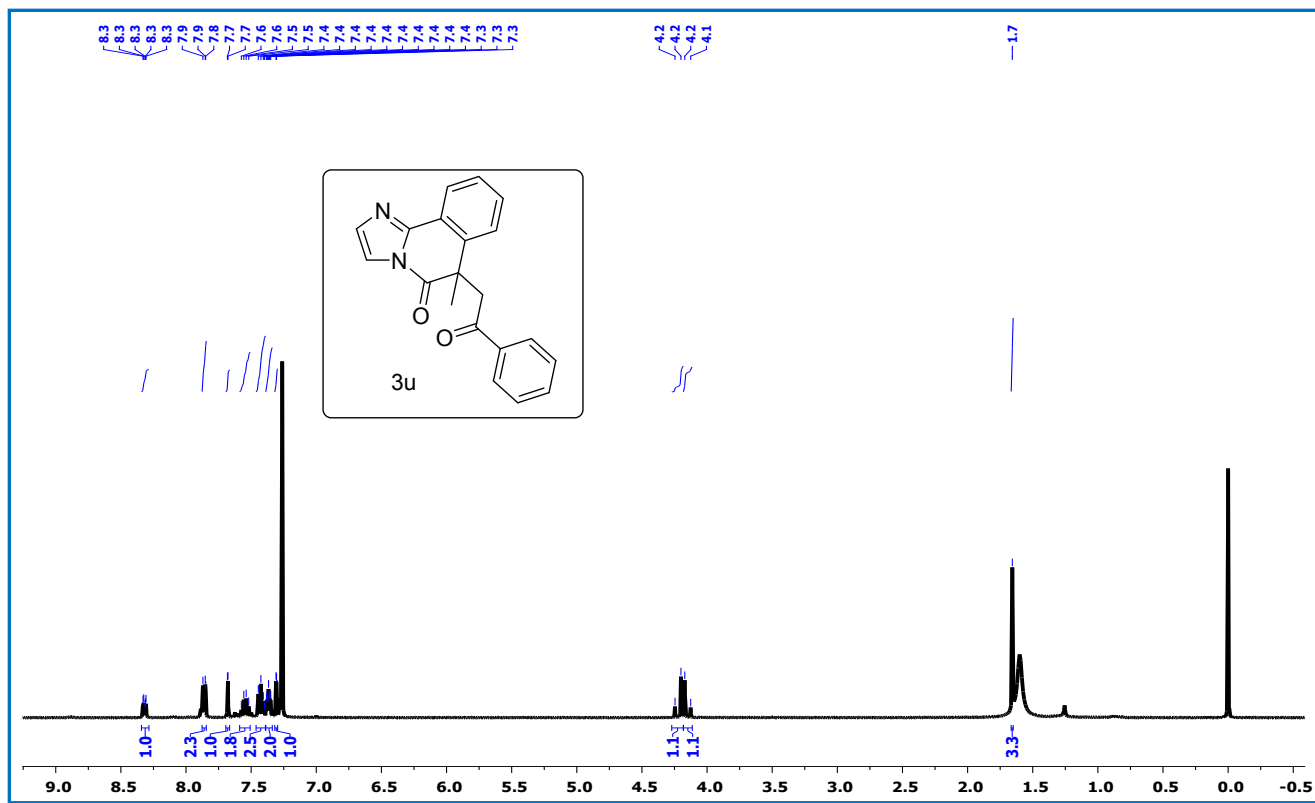

**<sup>13</sup>C NMR (126 MHz, CDCl<sub>3</sub>) of compound (3u)**

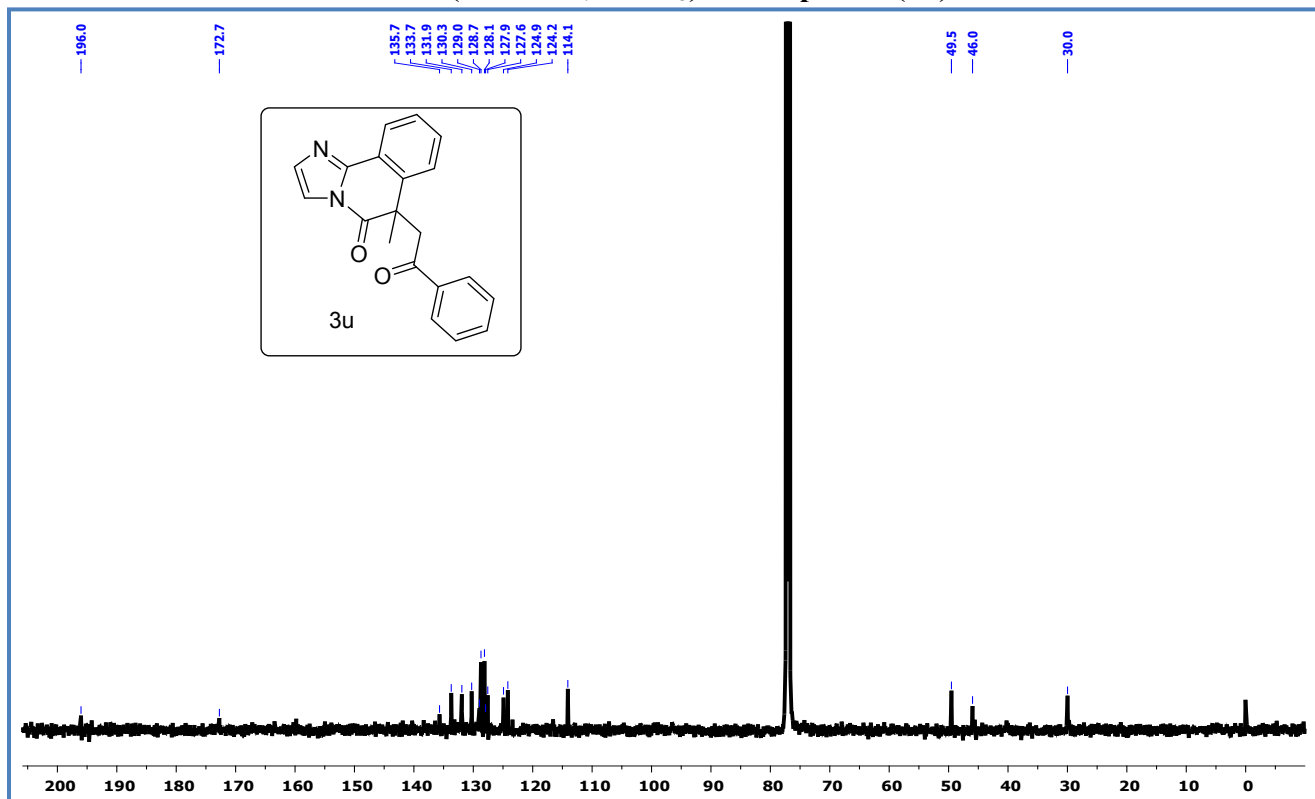



### <sup>1</sup>H NMR (400 MHz, CDCl<sub>3</sub>) of compound 4a

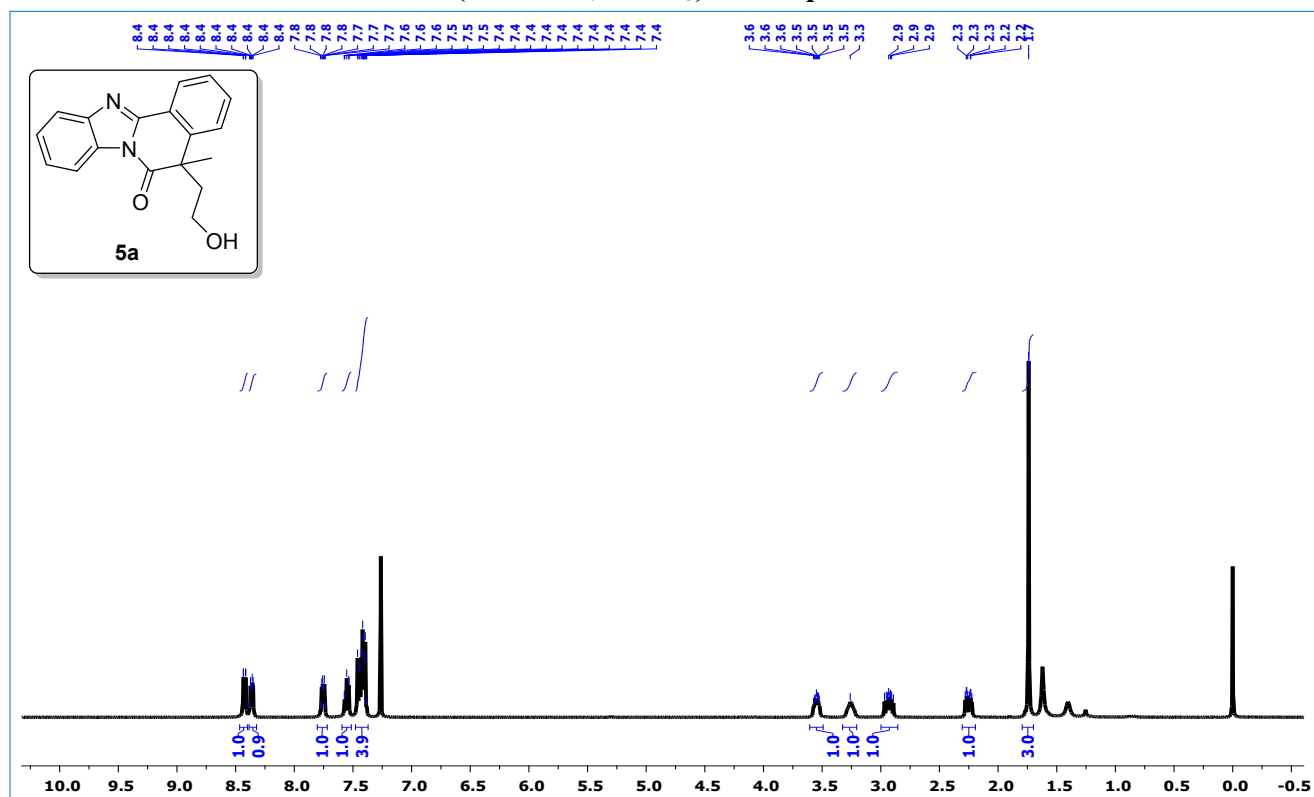

### <sup>13</sup>C NMR (100 MHz, CDCl<sub>3</sub>) of compound 4a

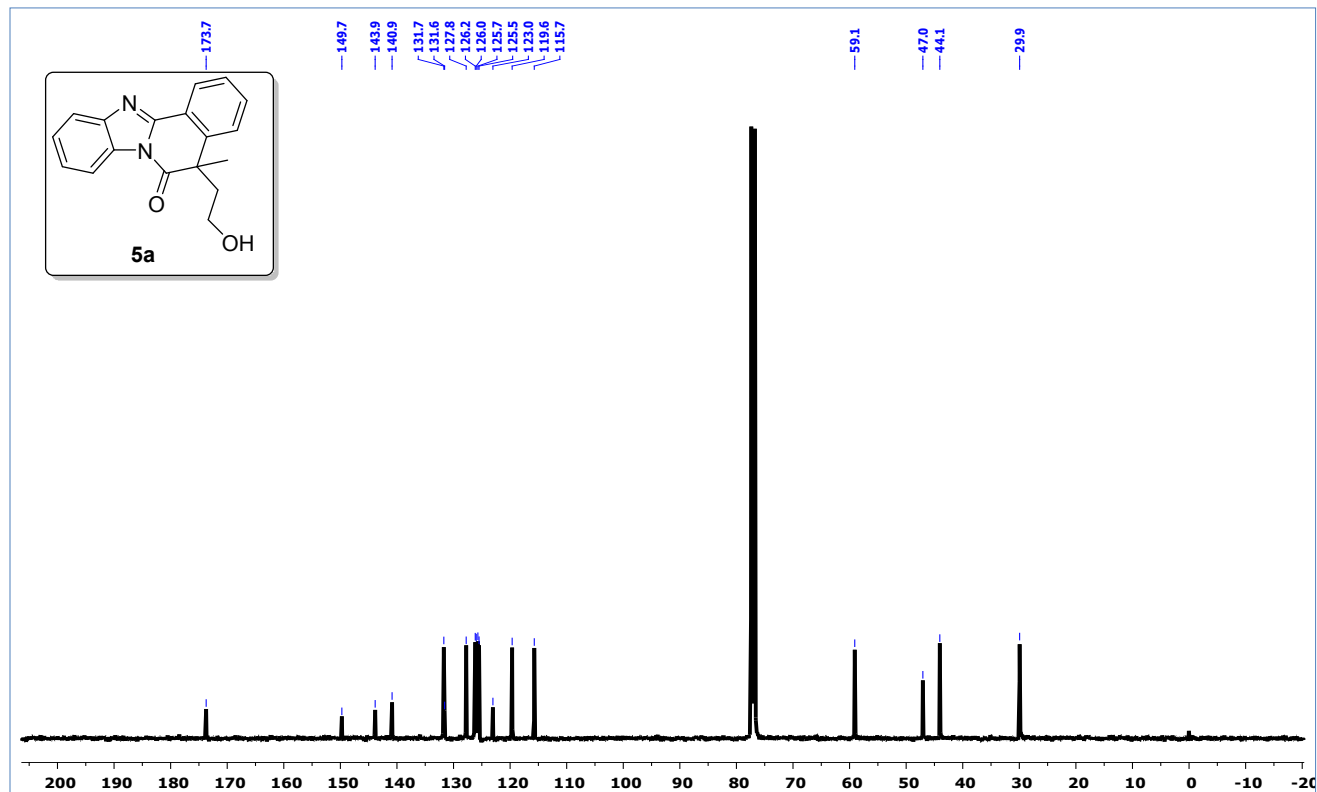



<sup>1</sup>H NMR (400 MHz, CDCl<sub>3</sub>) of compound 4b

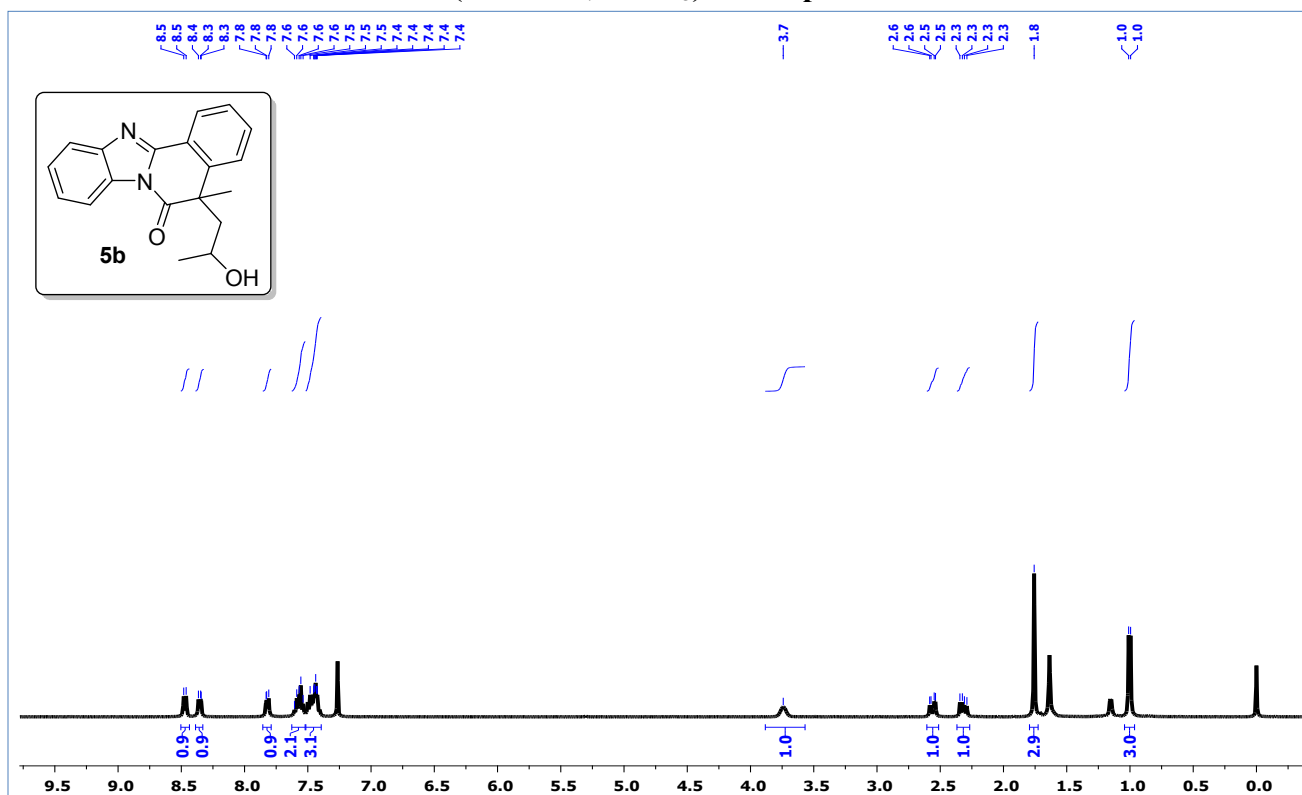

<sup>13</sup>C NMR (100 MHz, CDCl<sub>3</sub>) of compound 4b

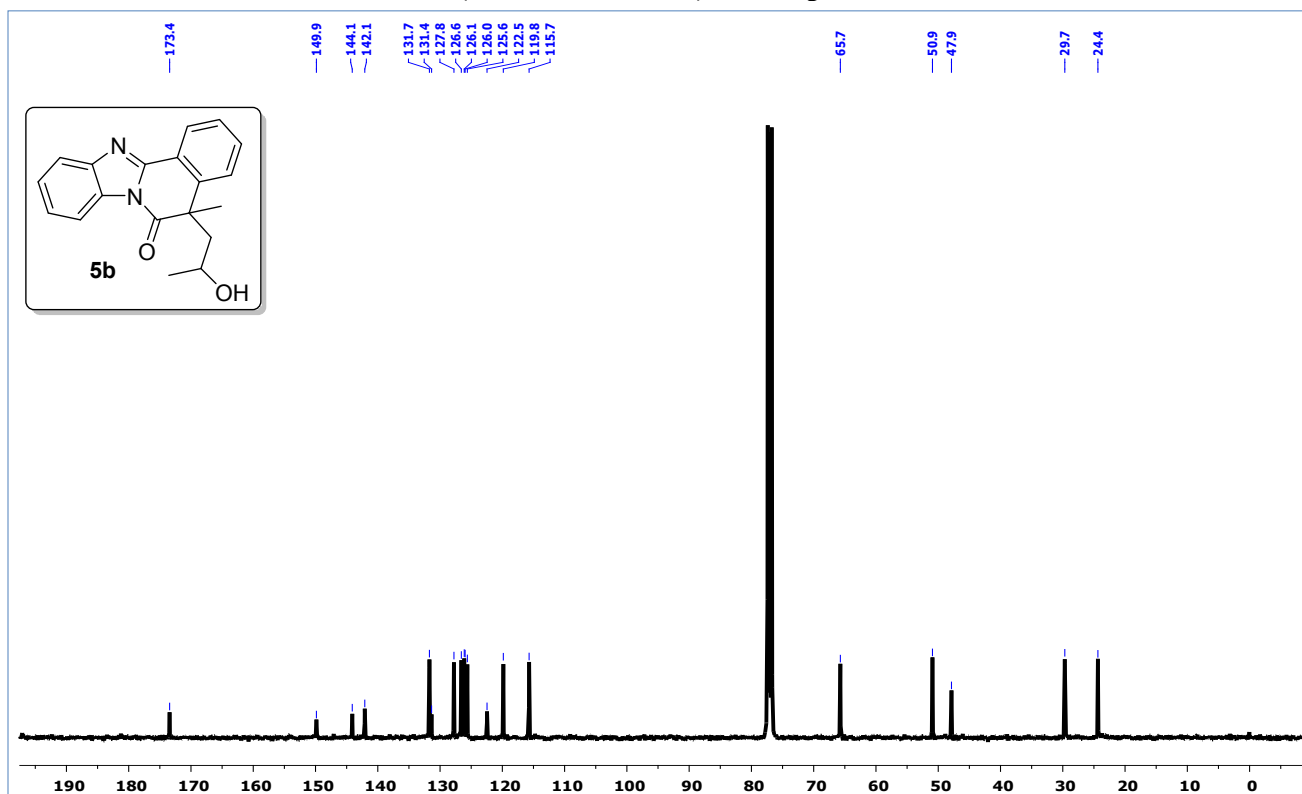

Supplement: c9ob01979k1.pdf [file c9ob01979k1.pdf]
